# Supplementary material for: Amorphous and Crystalline Silica Nanoparticles Recovered from Polymer-Silica Hybrid Films
Source: Research Square preprint supplement (doi:10.21203/rs.3.rs-8743572/v1), 2026-02-09
Supplement: Supplementary file 1 [file 3bae9a9b5e4ed5582bbc9e3b.docx]

**Synthesis and Characterization of Silica Nanoparticles recovered from Polymer-Silica Hybrid Films**

Abdullah A. Al Haddad, Ali Bumajdad*, Fakhreia Al Sagheer*

*aChemistry Department, Faculty of Science, Kuwait University, P.O. Box: 5969, Safat 13060, Kuwait.*

* Corresponding Author: Ali Bumajdad ([a.bumajdad@ku.edu.kw)](mailto:a.bumajdad@ku.edu.kw)); Fakhreia Al Sagheer ([fakhreia@gmail.com](mailto:fakhreia@gmail.com))

3.1 Hybrid-film characterization

*3.1.1 Energy dispersive X-ray spectroscopy (EDS)*


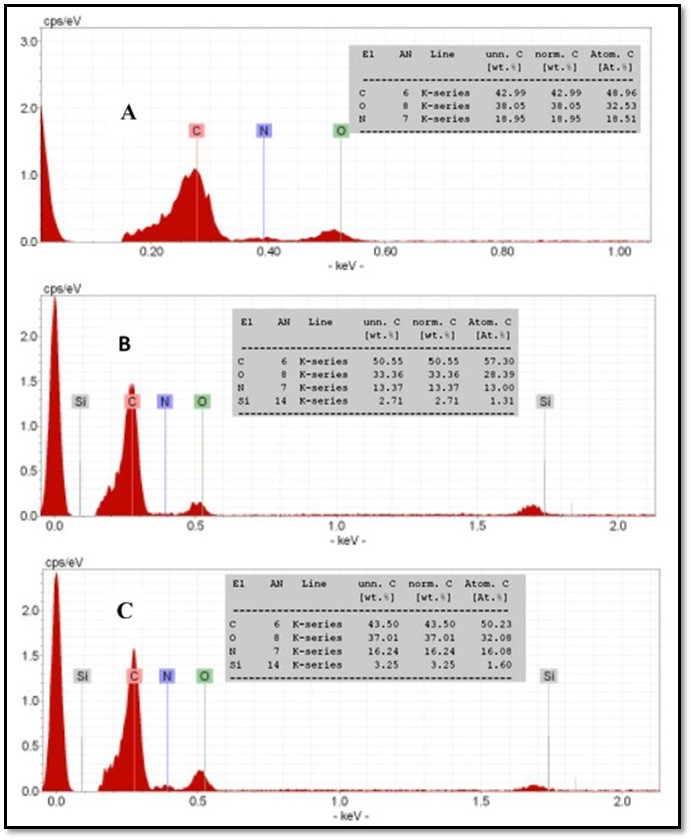


**D**

**E**

Figure 1S. EDS spectra of aramid-silica hybrids; (A) pure aramid film, (B) UB-Ar-5% hybrid film and (C) UB-Ar-5% hybrid film. EDS spectra of chitosan-silica hybrids; (D) pure chitosan film, (E) Cs-Si-20% hybrid film.

*3.1.2 Fourier-transform infrared, FT-IR*

(a)

(b)

**
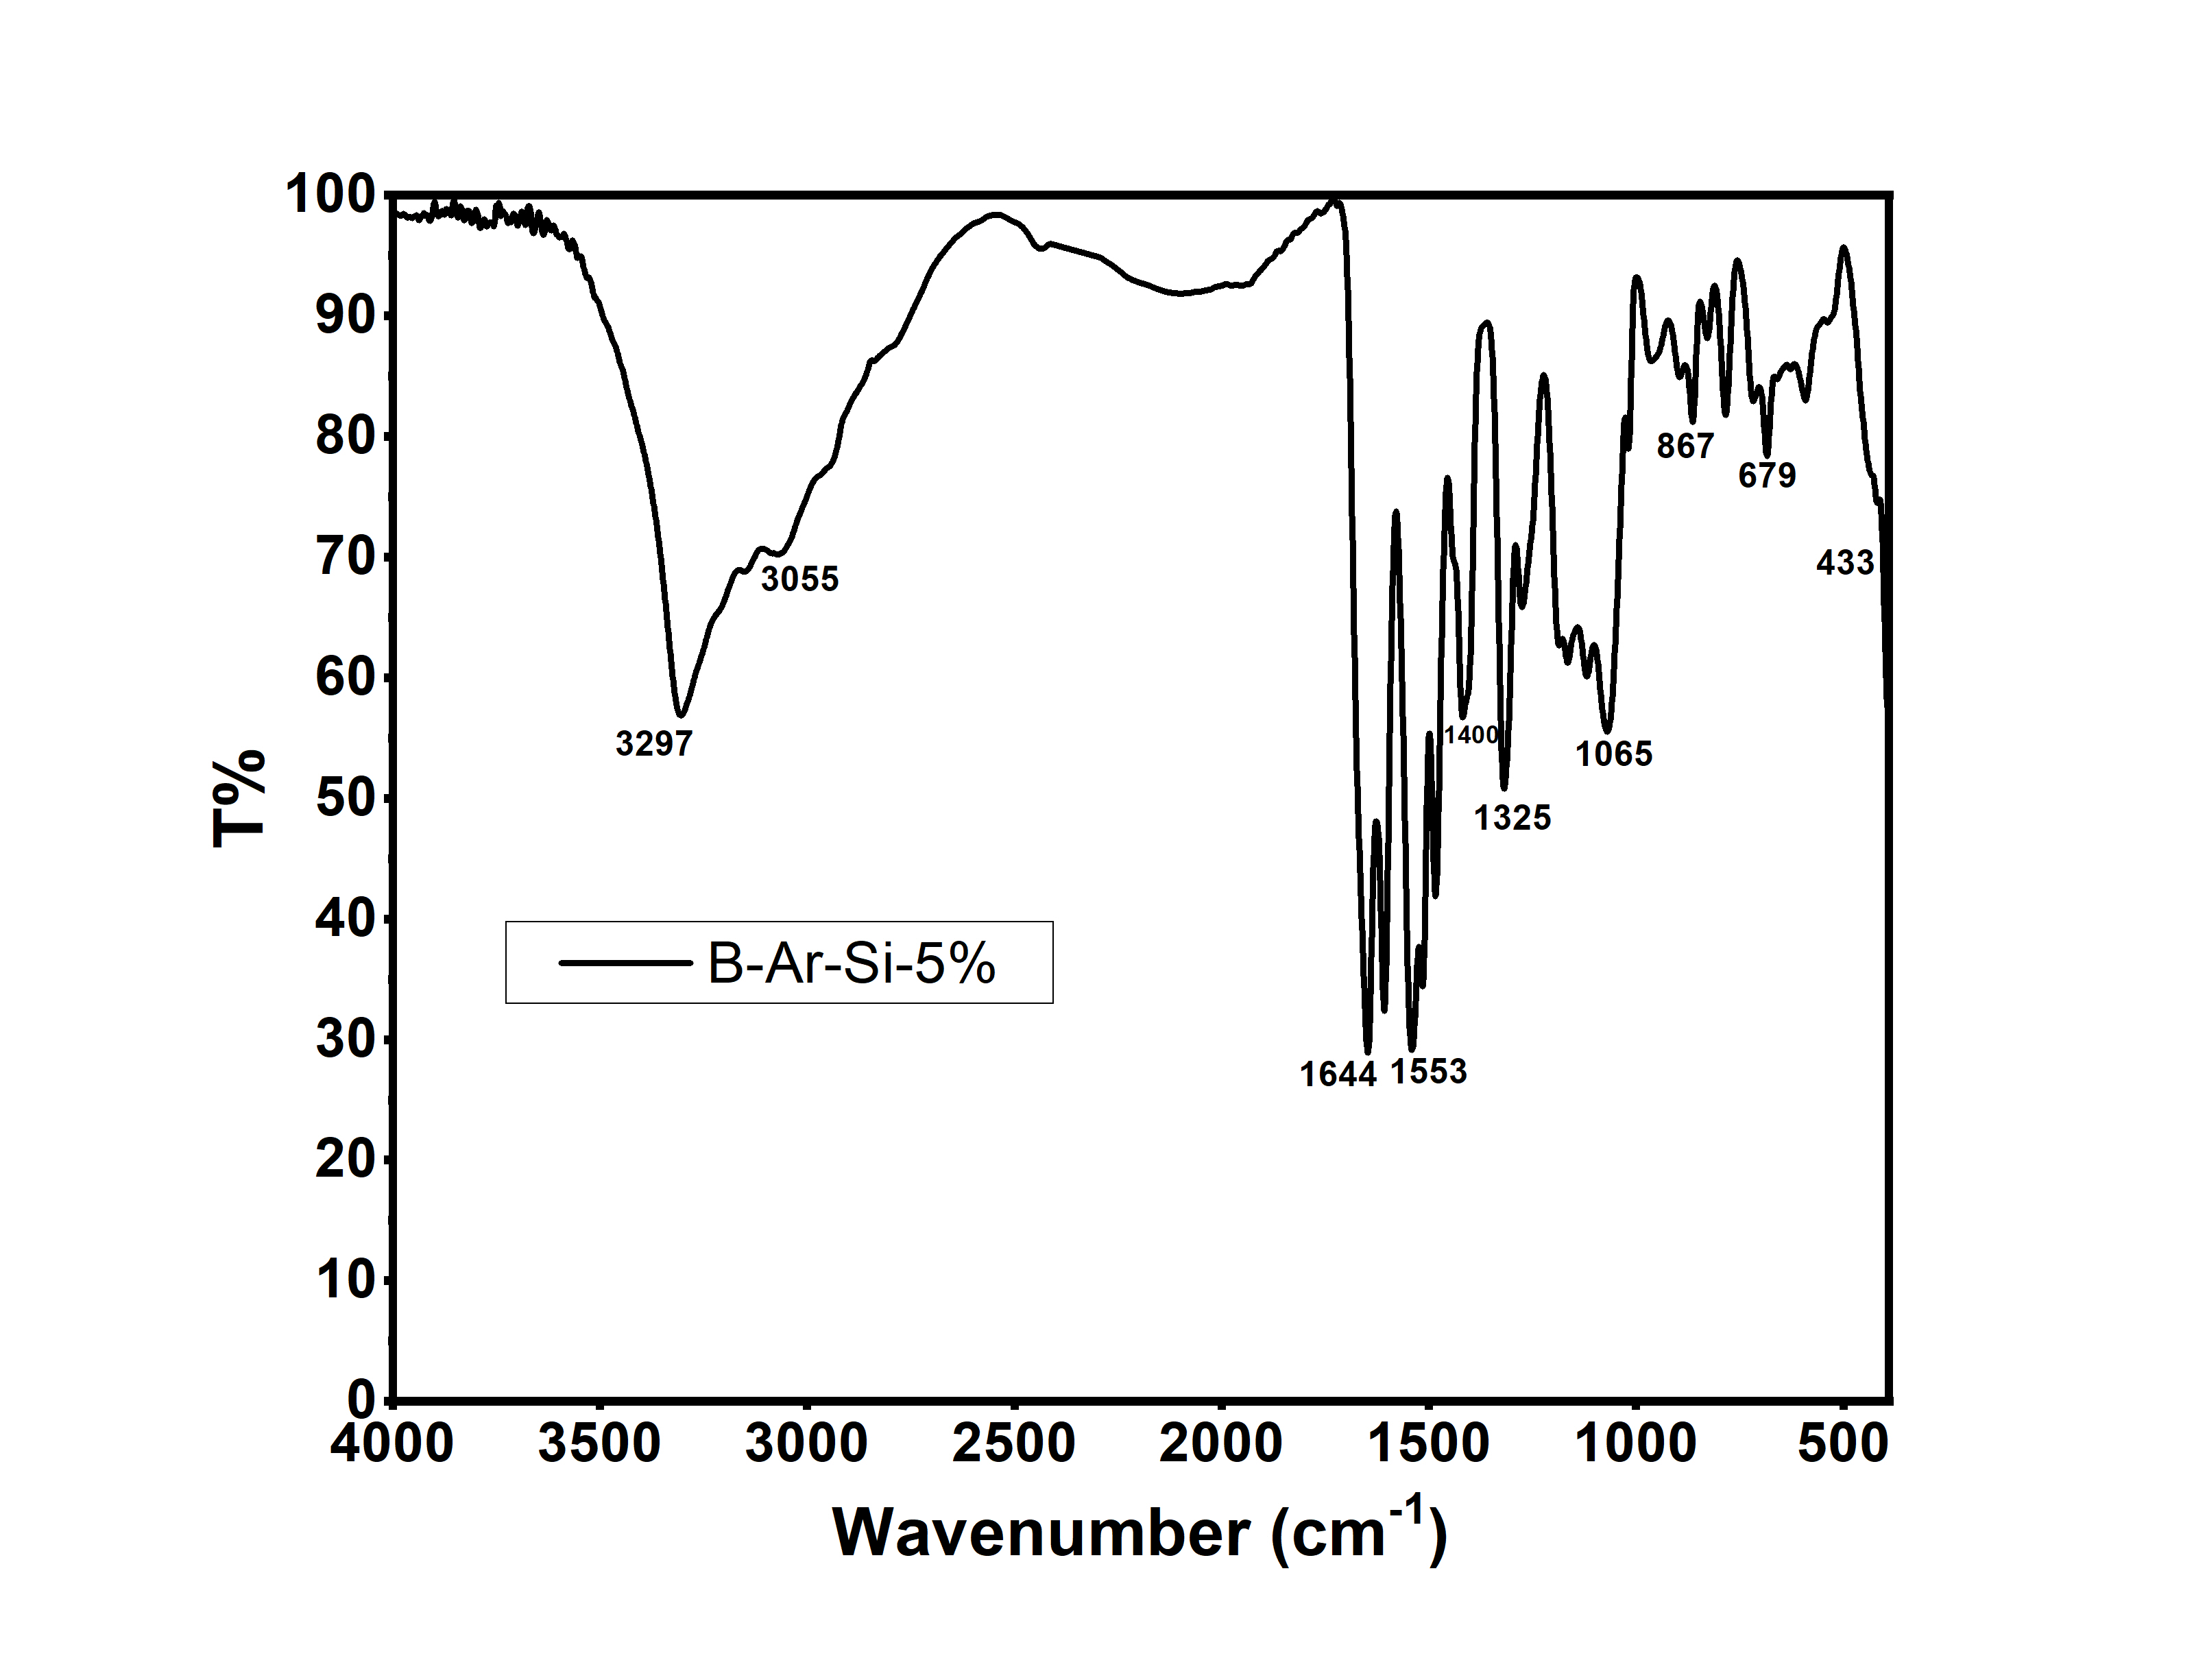
**

(C)

**
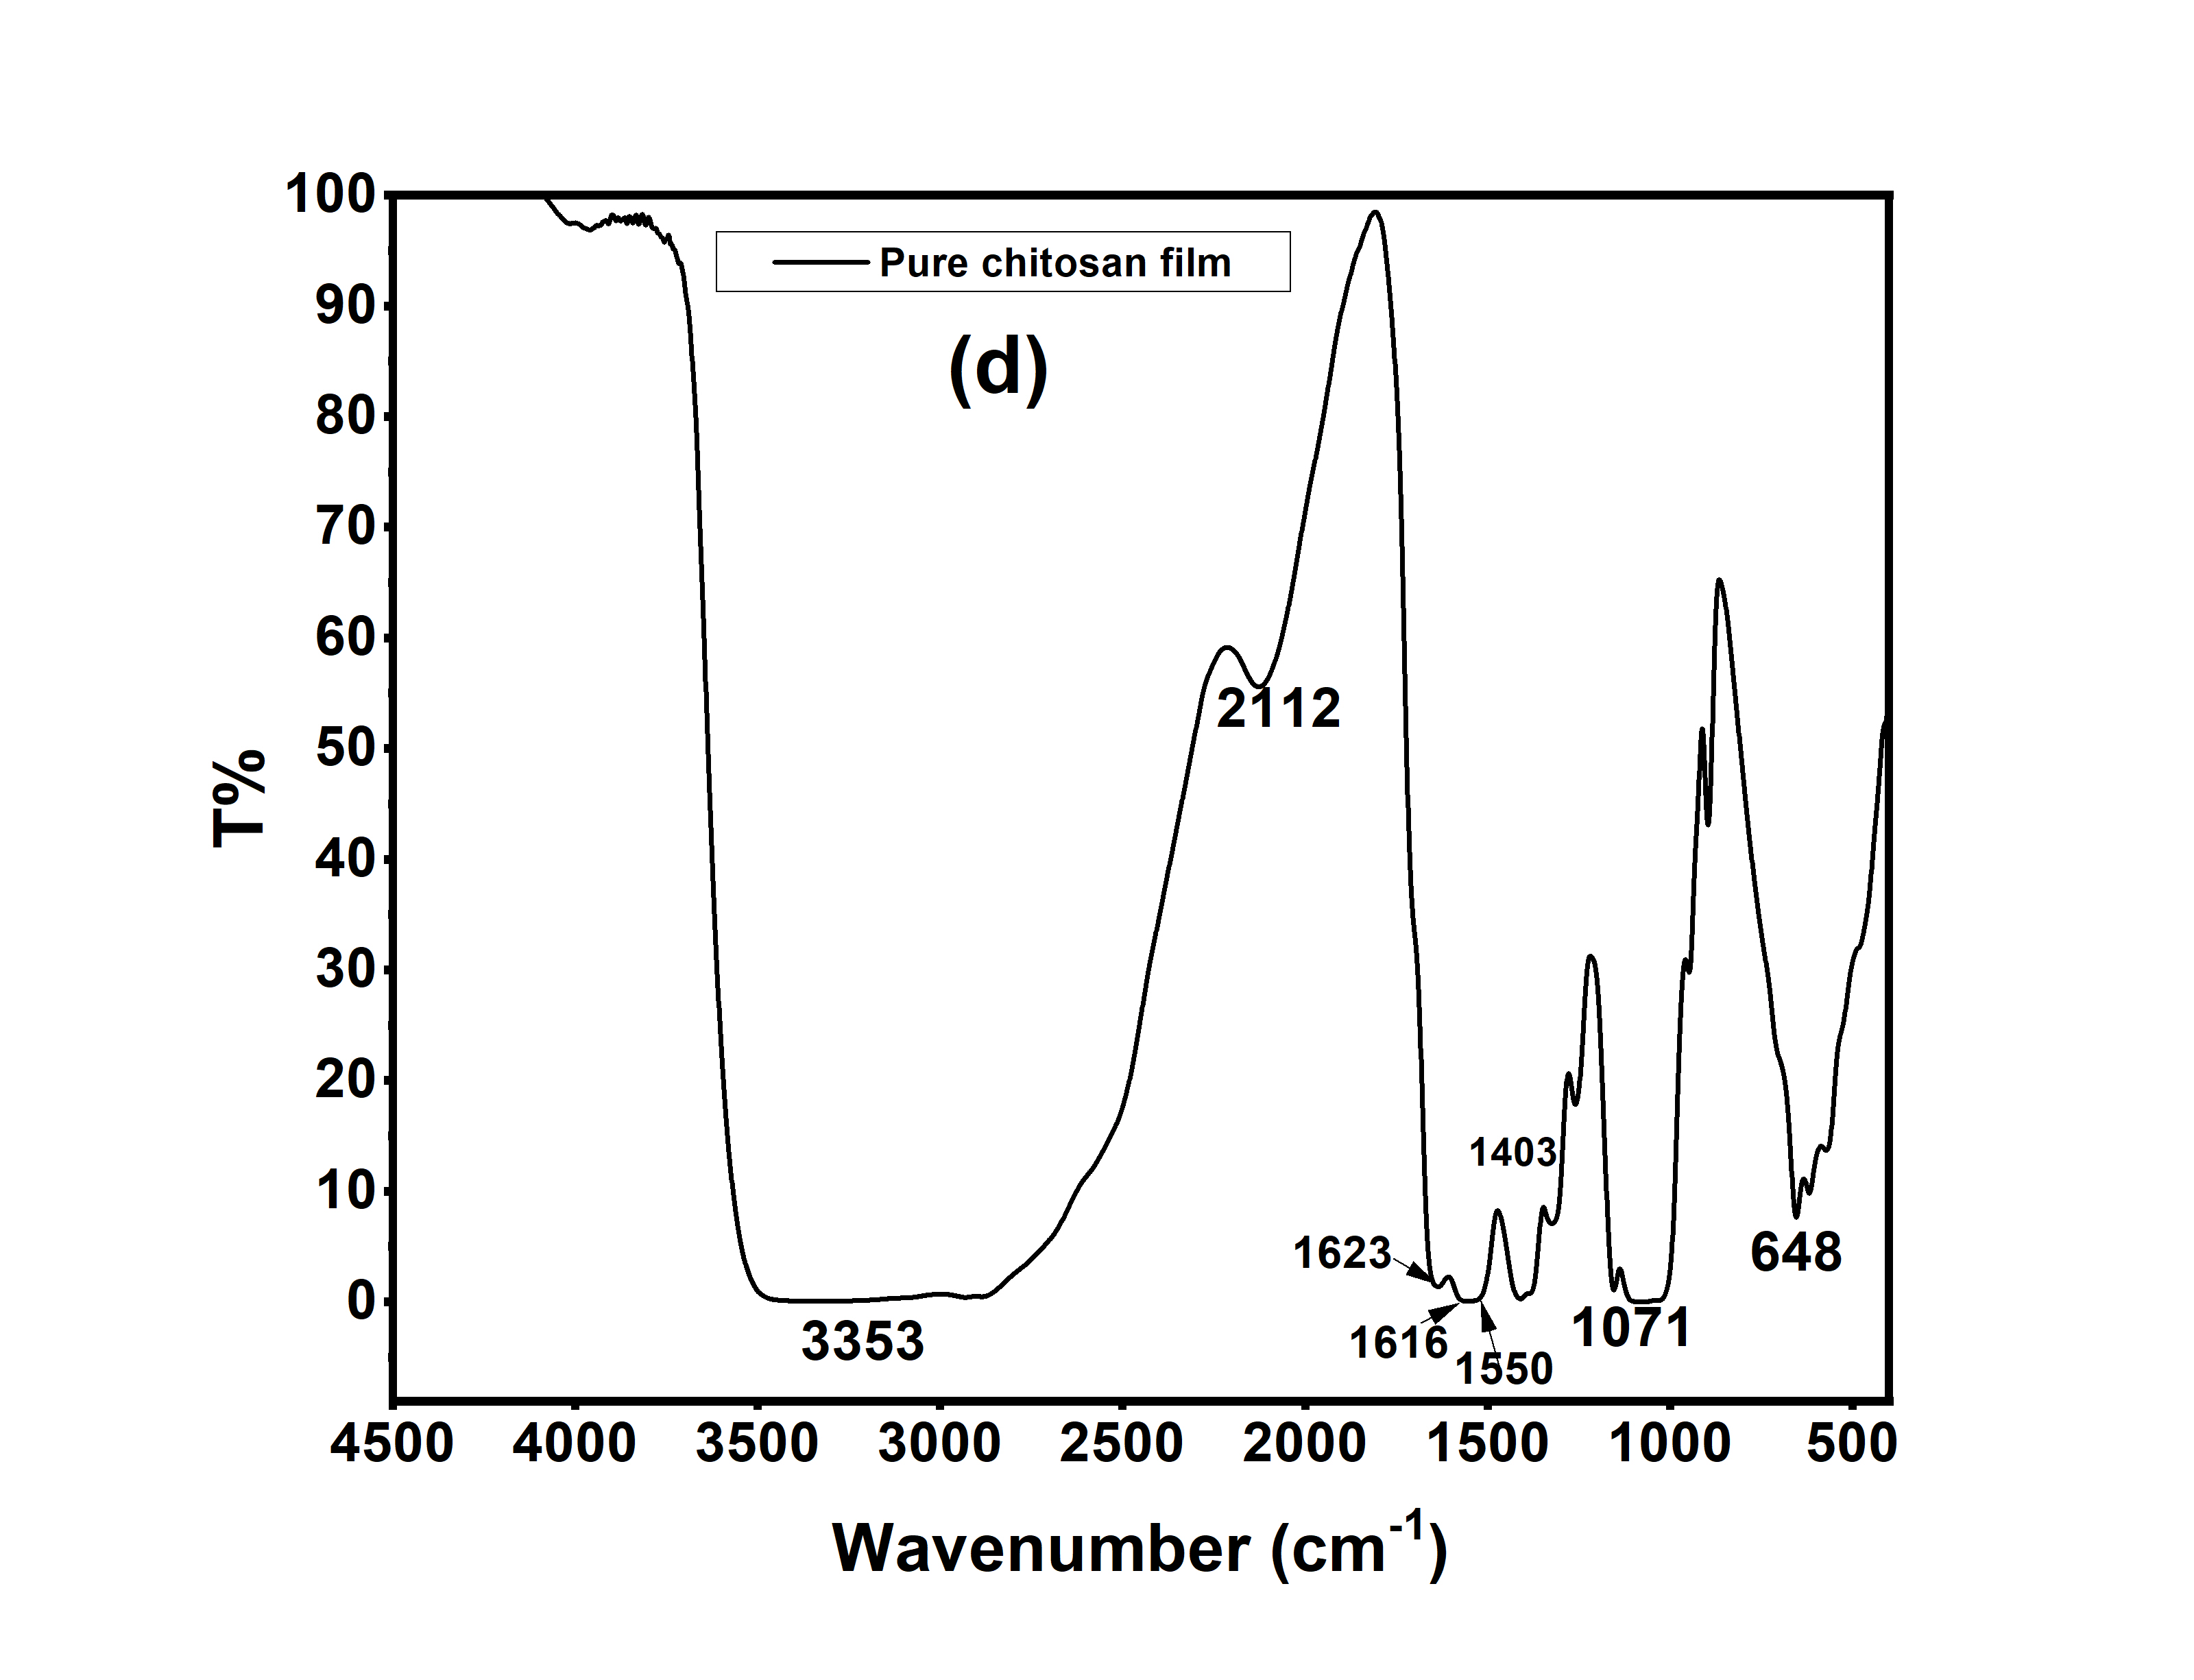
**

**
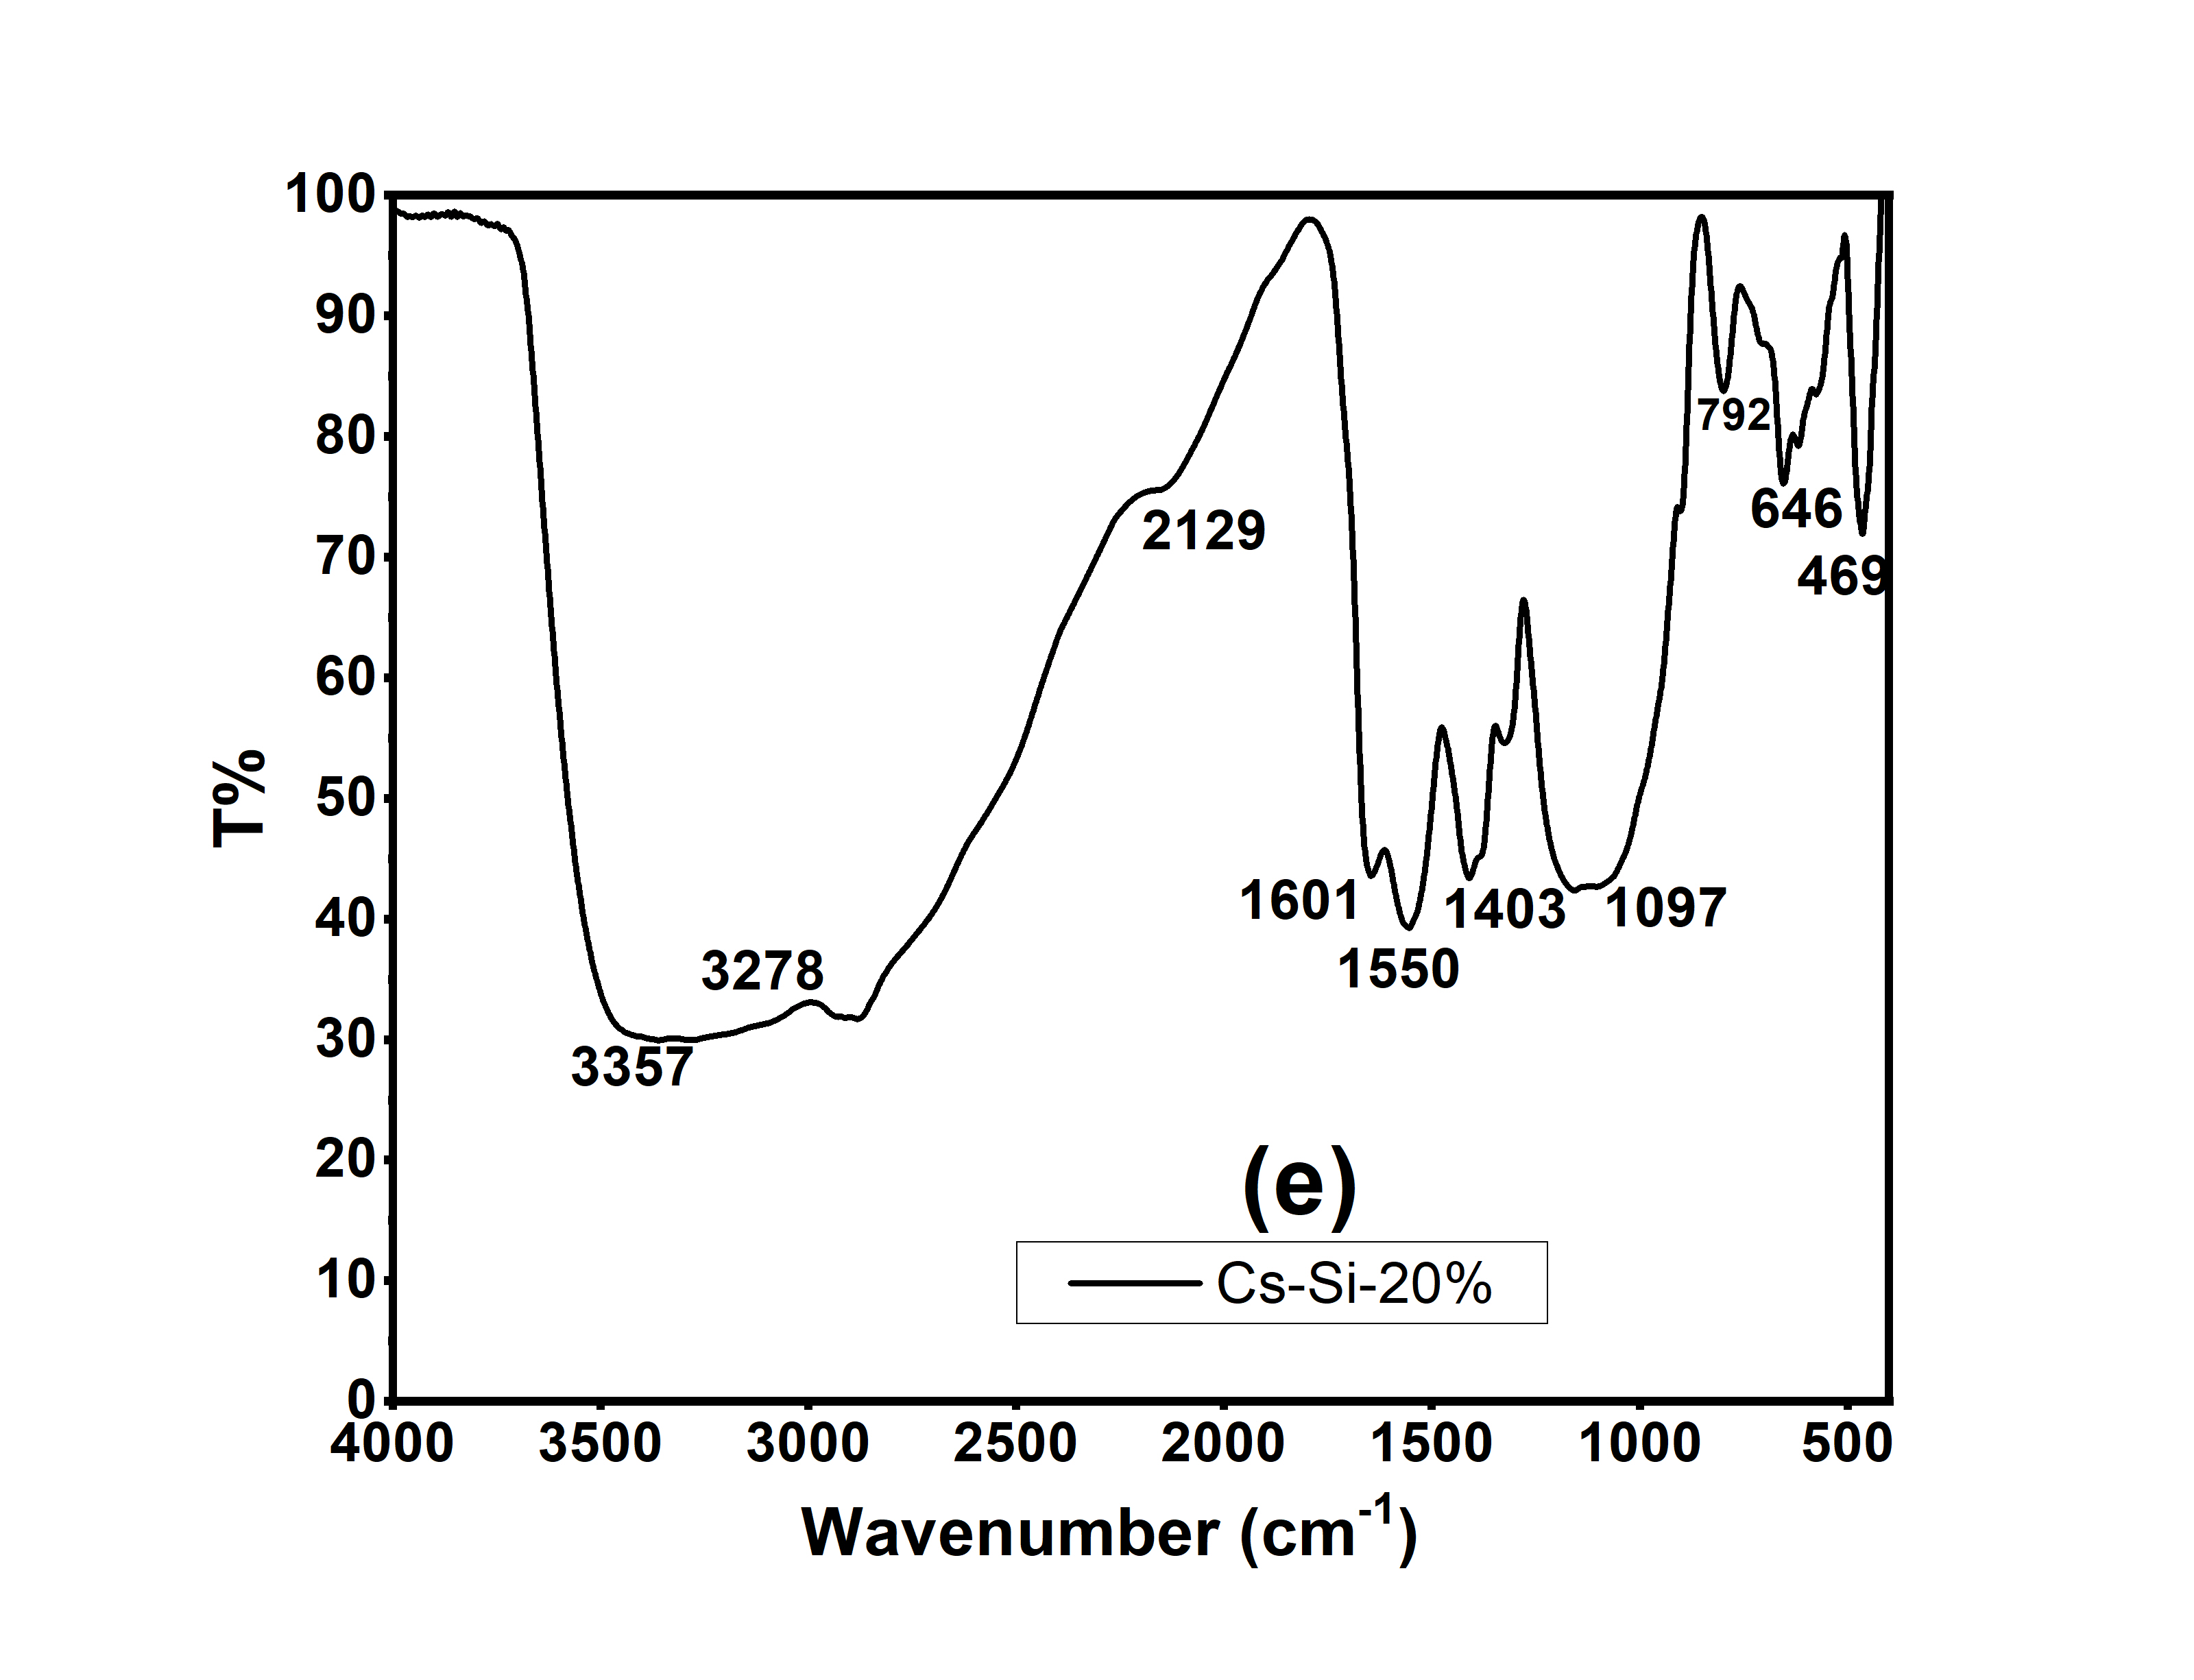
**

Figure 2S. FTIR spectrum of Pure aramid (a), UB-Ar-Si-5% (b), B-Ar-Si-5% (c), pure chitosan (d), and Ch-Si-20% (e) hybrid film.

**3.2 Silica characterization**

*3.2.1 Fourier-transform infrared, FT-IR*

**
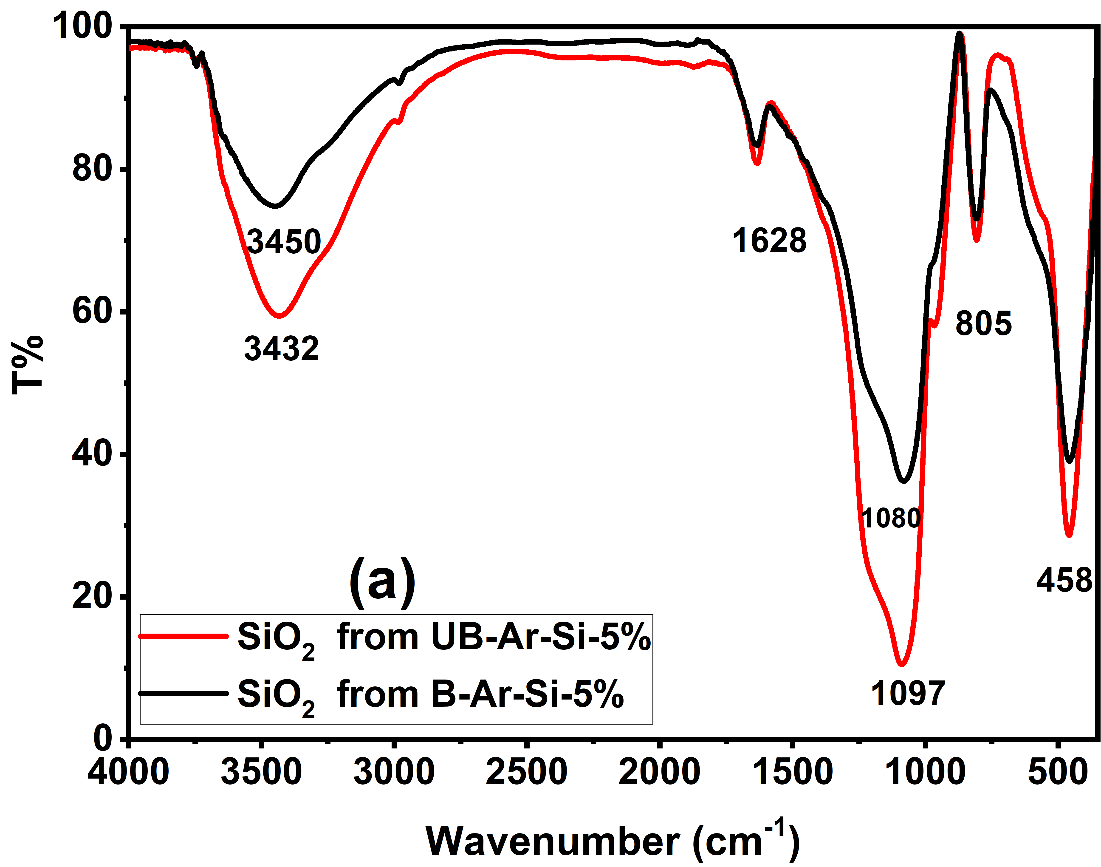
**

**
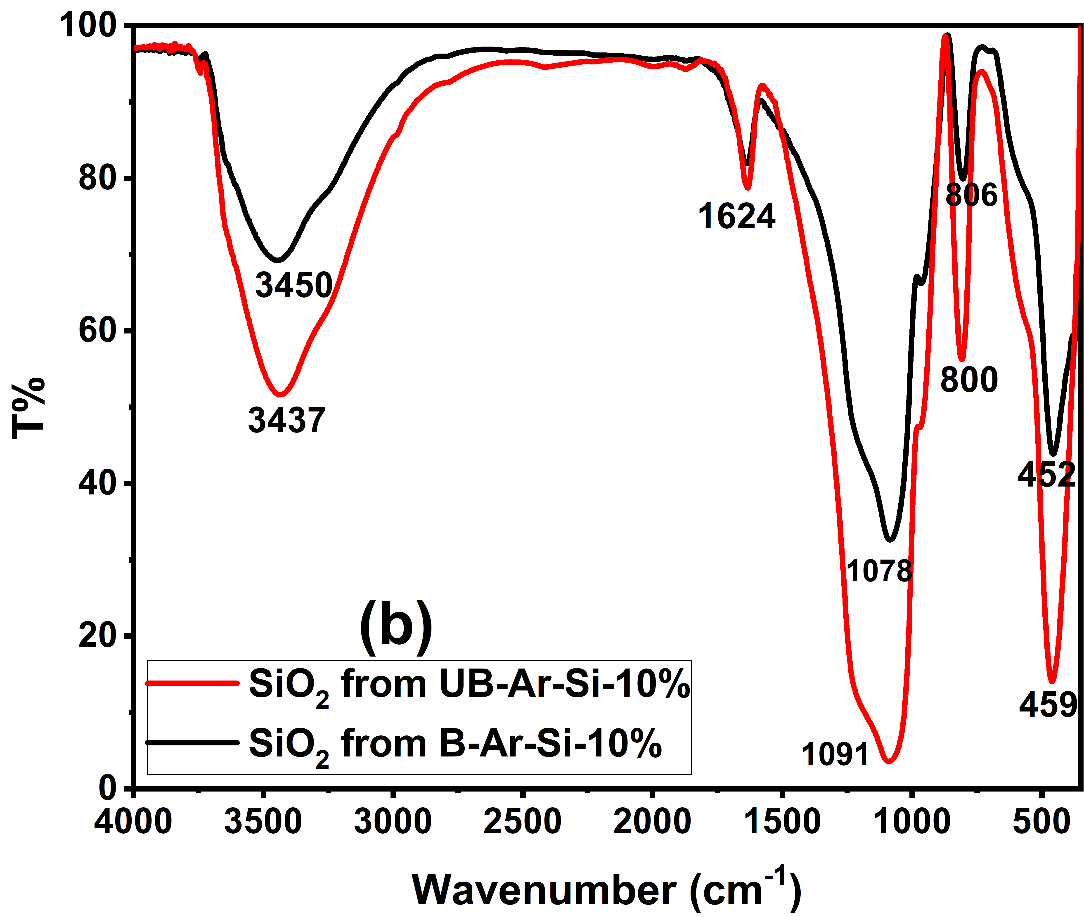
**

**
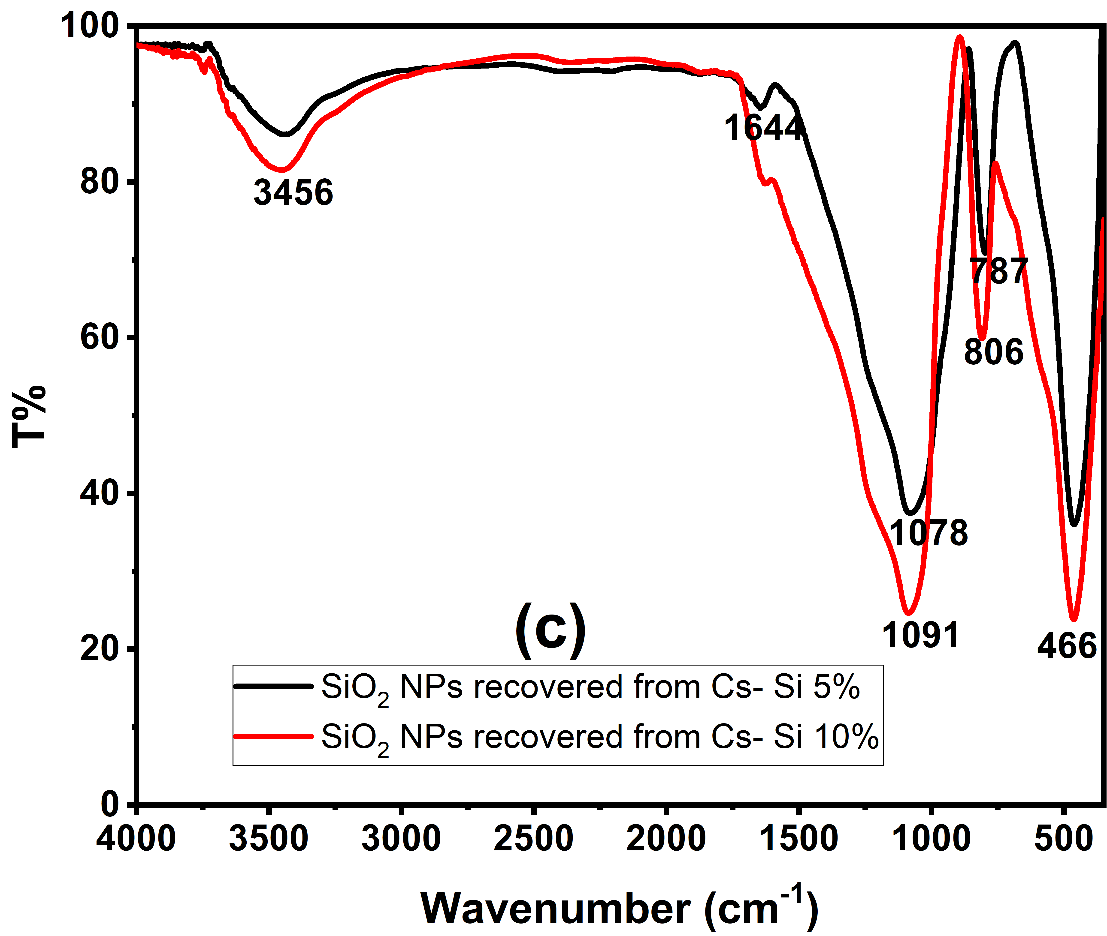
**


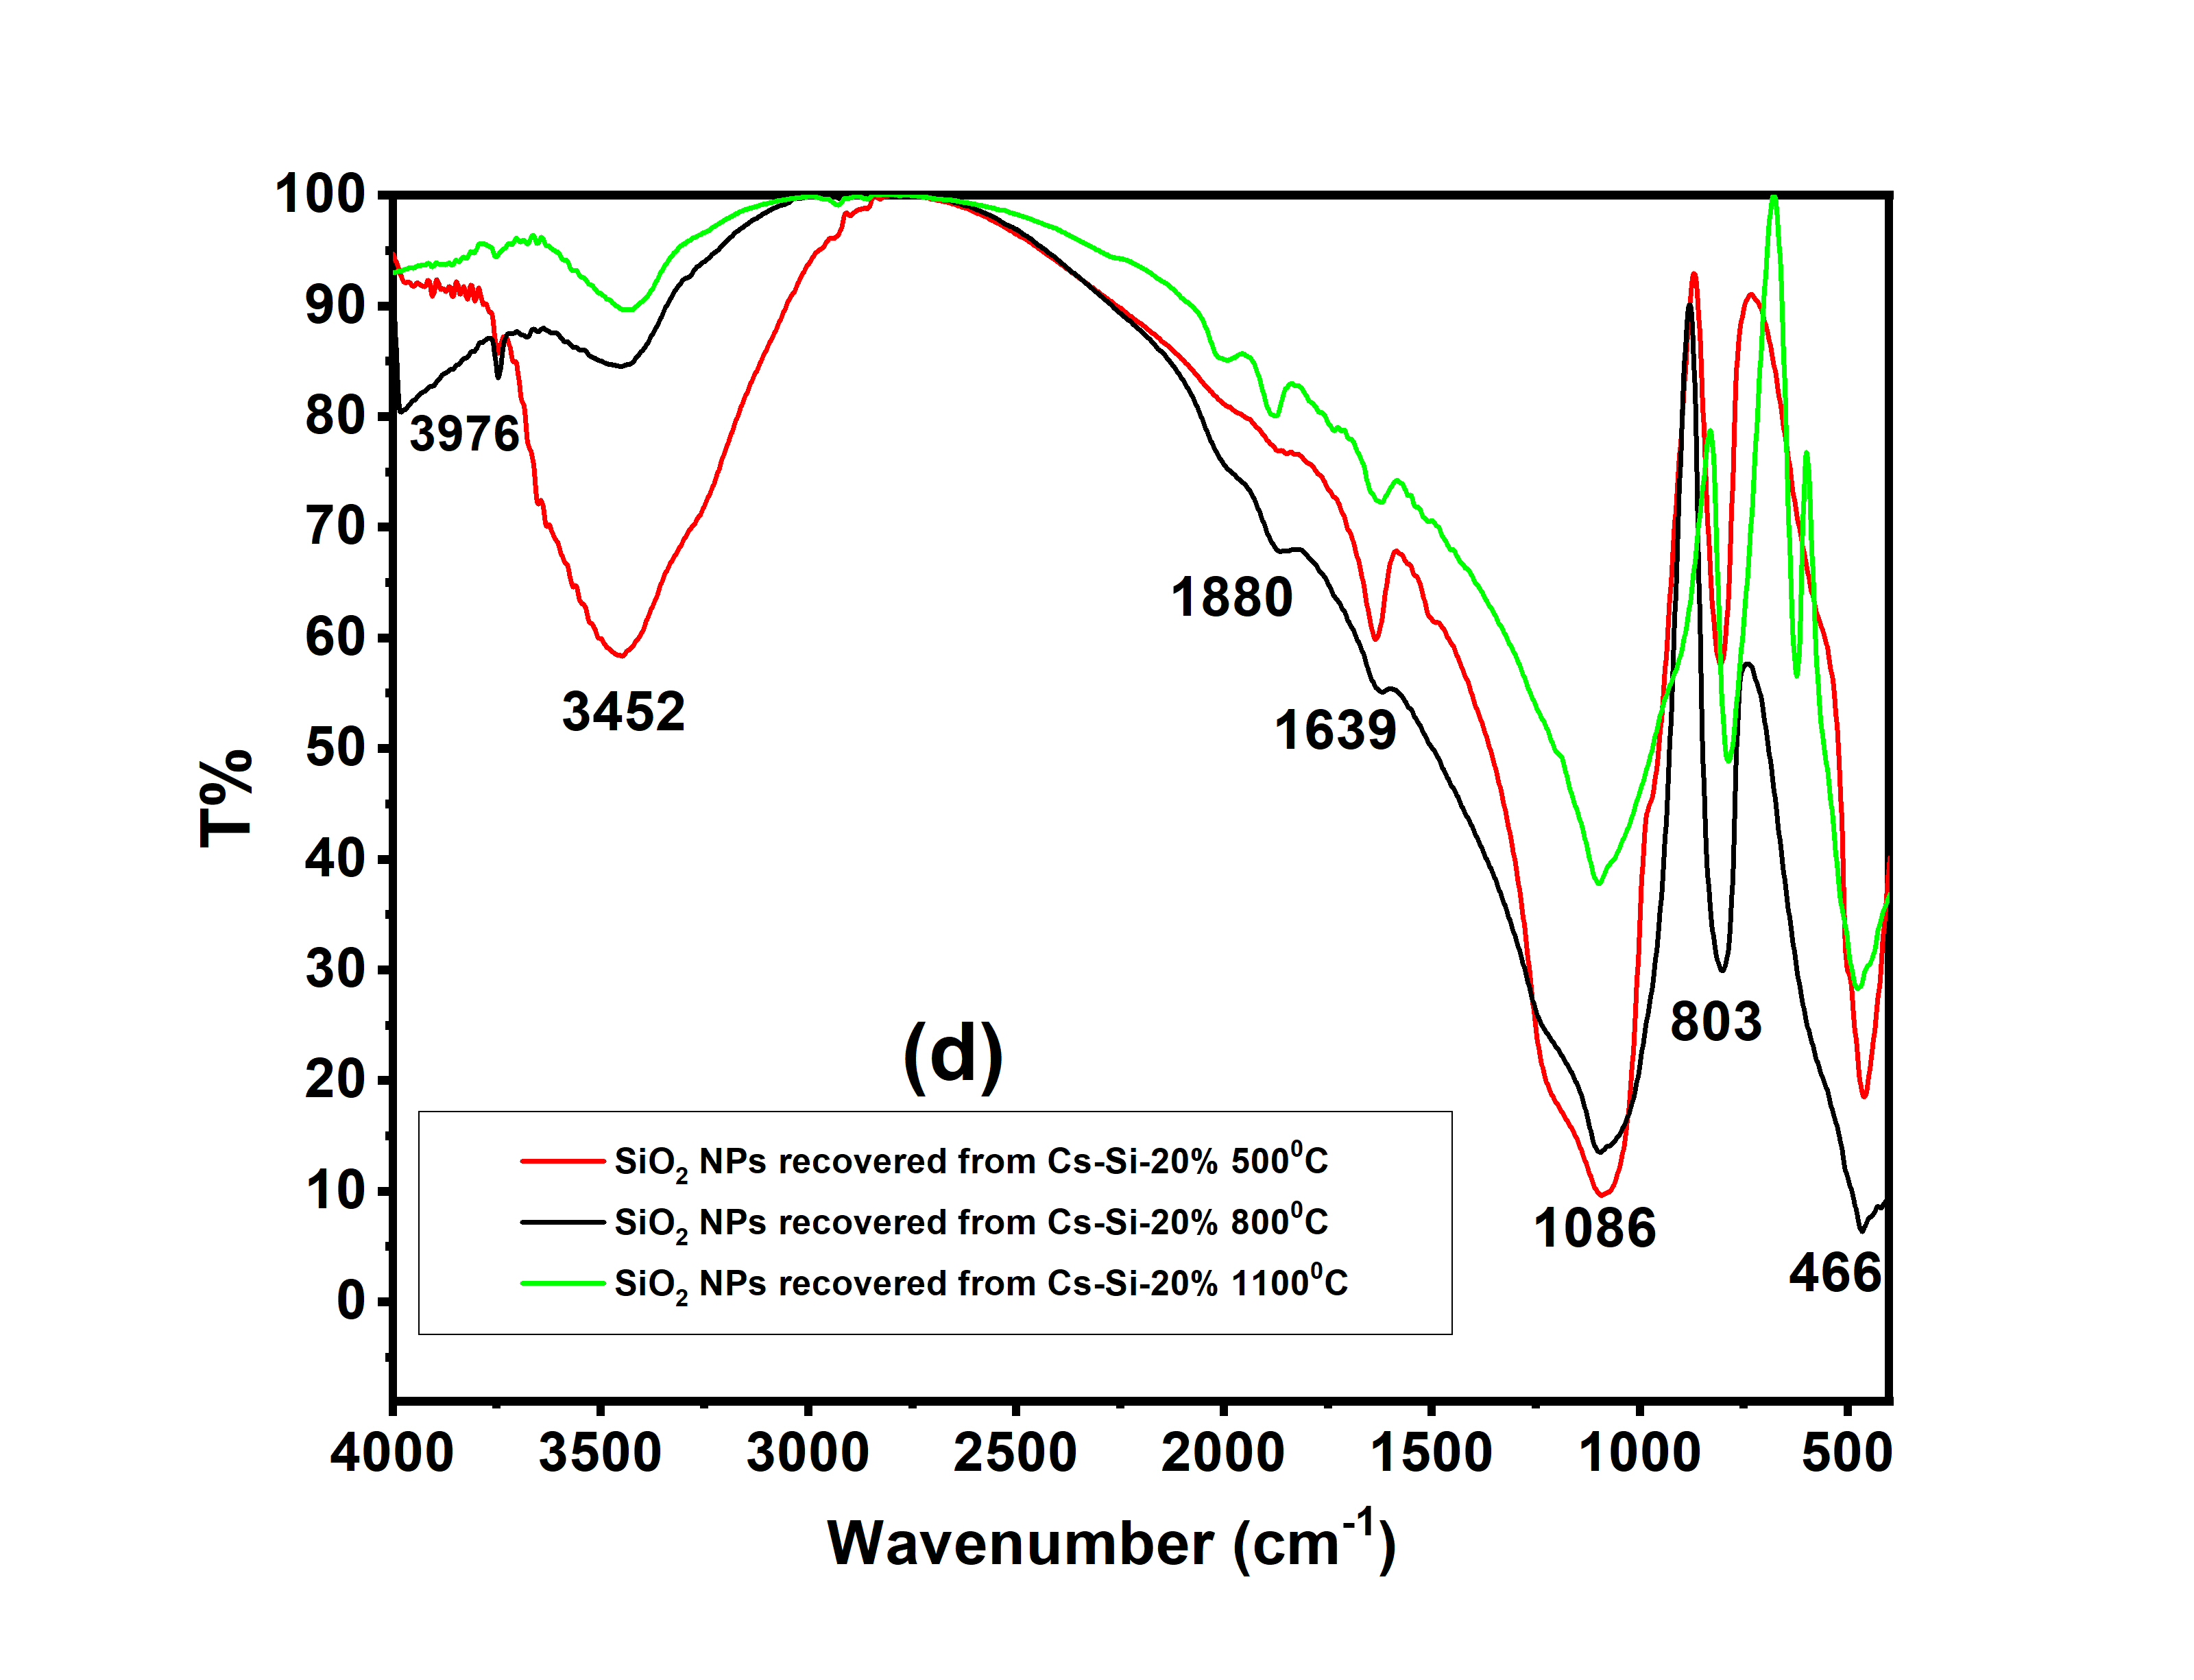


Figure 3S. FTIR spectra for SiO2 NPs recovered at 500°C from UB-Ar-Si-5% and B-Ar-Si-5% hybrid films (5% loading (a) and 10% loading (b)). FTIR spectra for SiO2 NPs recovered at 500°C from Cs-Si-5% and Cs-Si-10% (c). FT-IR spectra of SiO2 NPs recovered from Cs-Si-20% after calcination at three different temperatures 500, 800 and 1100°C (d).

*3.2.2 Thermogravimetric analysis, TGA*


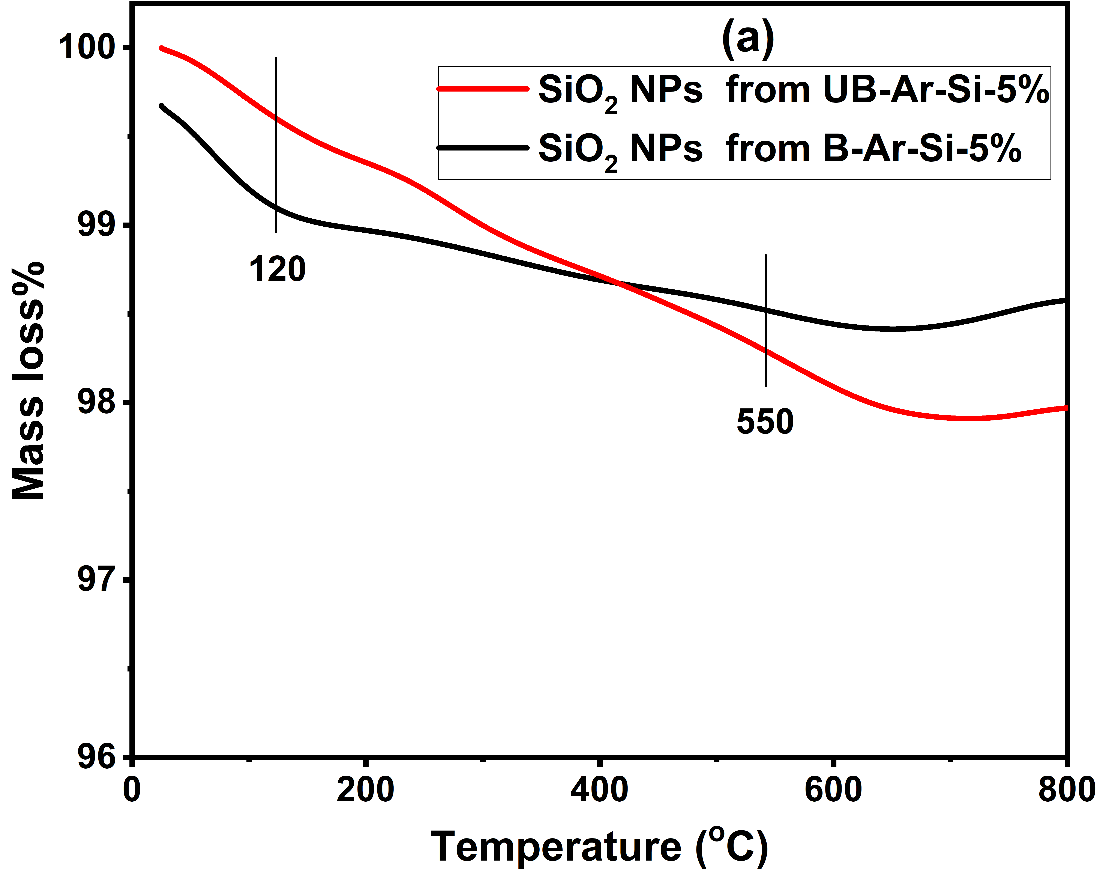


**
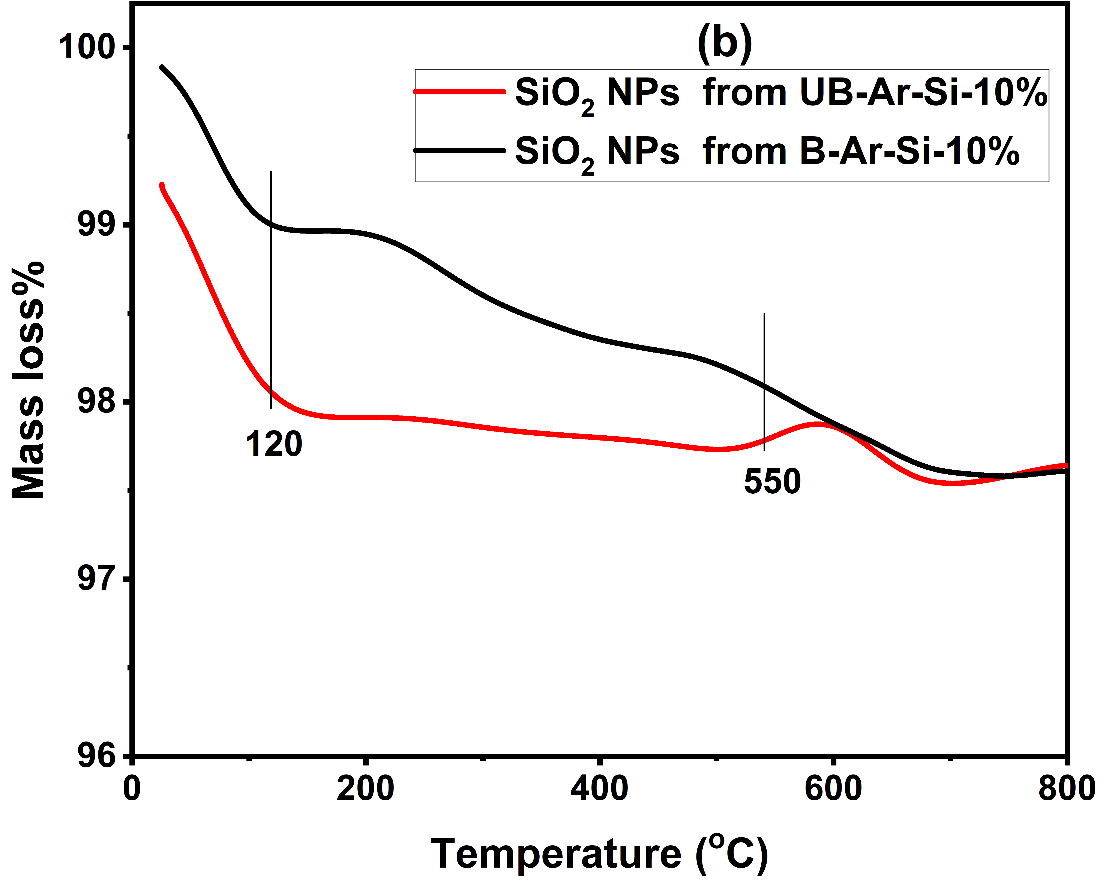
**

**
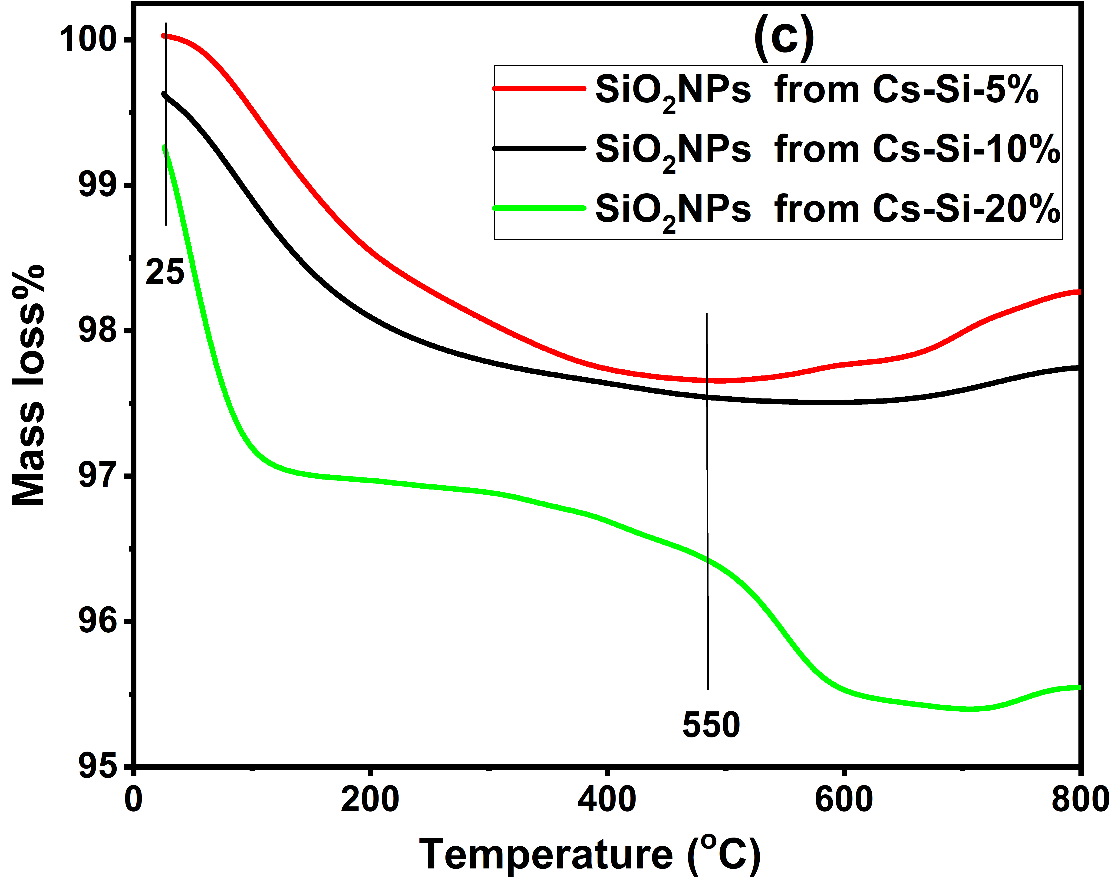
**

Figure 4S. TGA spectra for SiO2 NPs recovered at 500°C from: UB-Ar-Si-5% and B-Ar-Si-5% (a) UB-Ar-Si-10% and UB-Ar-Si-10% (b) and Cs-Si-5%, Cs-Si-10% and Cs-Si-20% (c).

*3.2.3 X-ray diffraction, XRD*


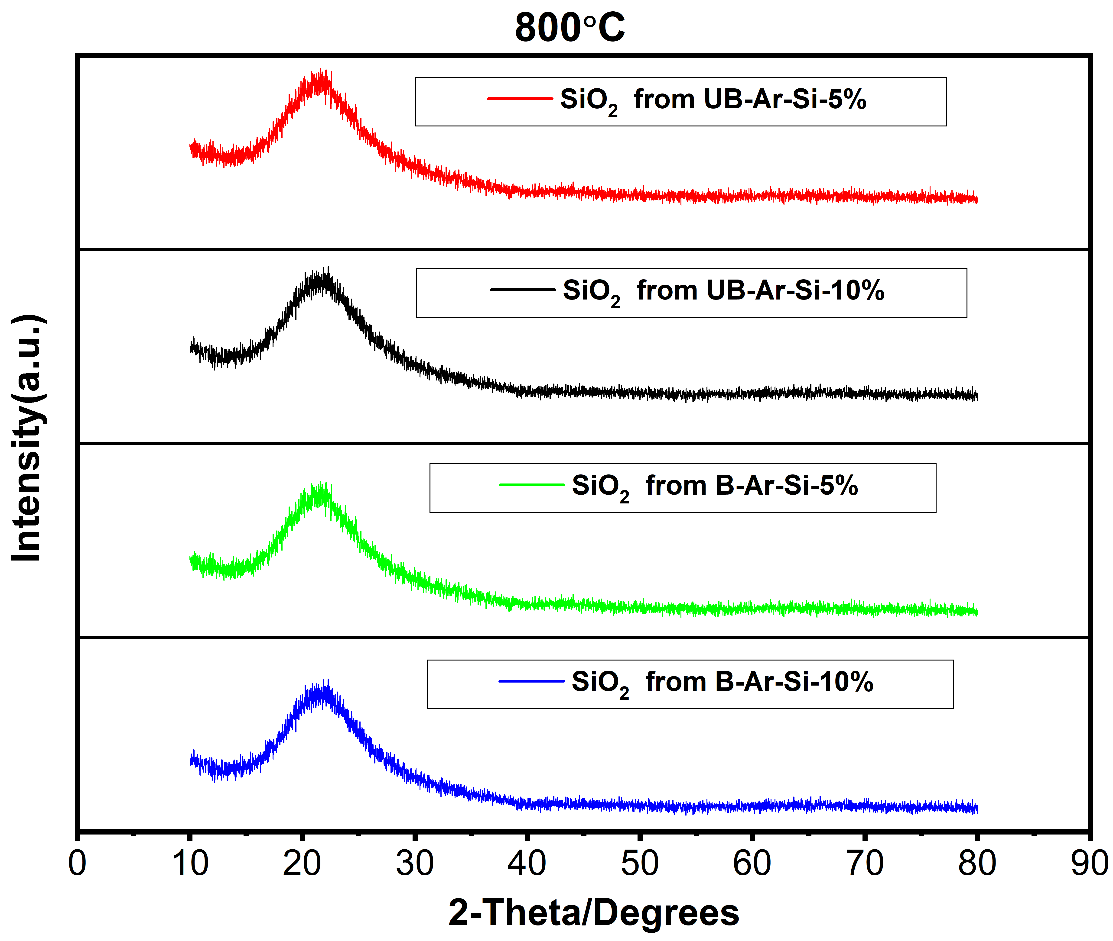


**
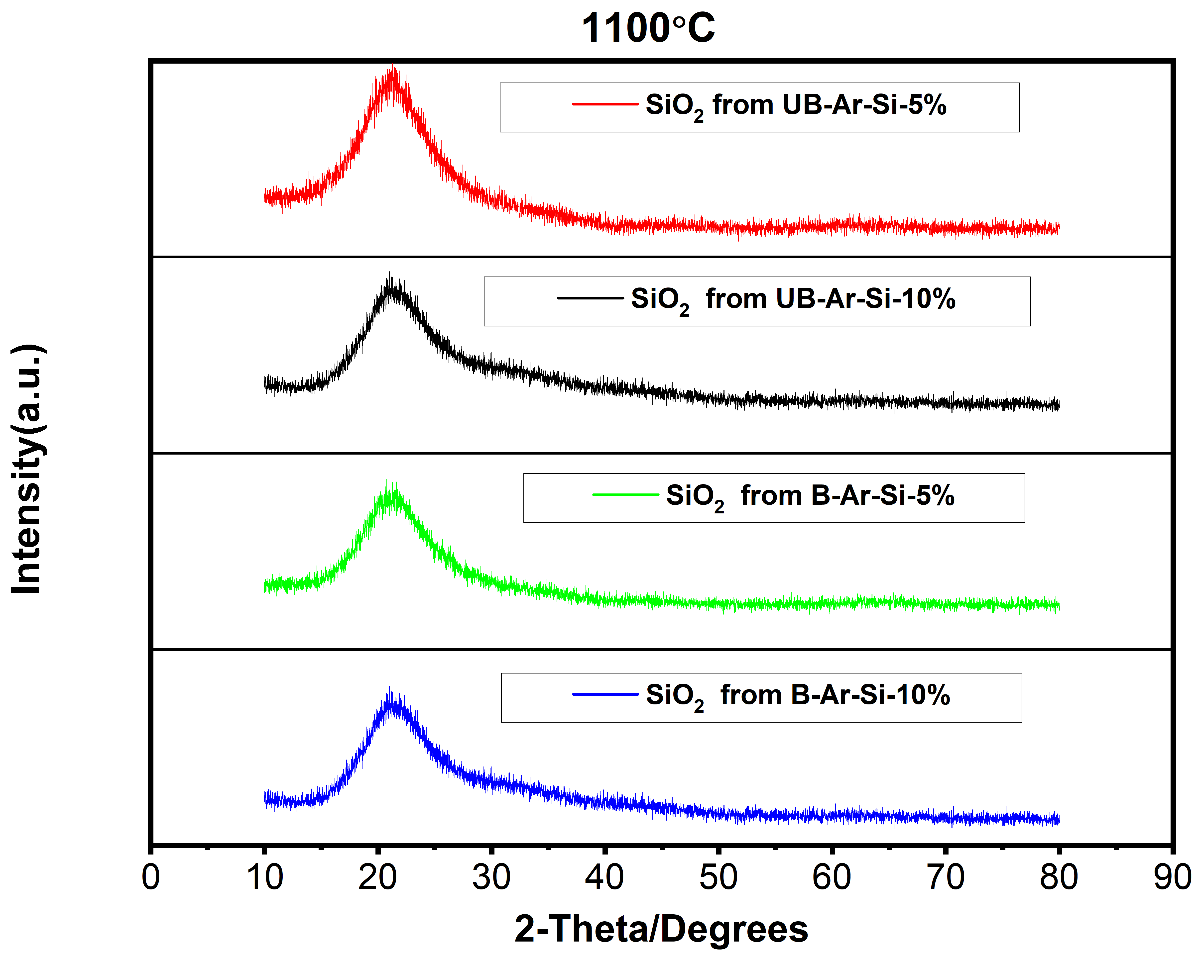
**

Figure 5S.XRD spectra for SiO2 NPs obtained using UB-Ar-Si-5&10%, B-Ar-Si-5&10%, after calcination of hybrid films at 800 οC and 1100οC.

Table 1S. Crystallite size of the silica NPs prepared using aramid-silica and chitosan-silica hybrids.

| Sample | Calcination Temperature (°C) | Crystallite size of NPs (nm)*a* |
| --- | --- | --- |
| UB-Ar-Si-5% | 500 | 1.8 |
| 800 | 1.5 |
| 1100 | 1.4 |
| UB-Ar-Si-10% | 500 | 1.7 |
| 800 | 1.3 |
| 1100 | 1.2 |
| B-Ar-Si-5% | 500 | 2.2 |
| 800 | 1.4 |
| 1100 | 1.3 |
| B-Ar-Si-10% | 500 | 2.3 |
| 800 | 1.5 |
| 1100 | 1.3 |
| Cs-Si-5% | 500 | 1.1 |
| 800 | 14.0 |
| 1100 | 5.6 |
| Cs-Si-10% | 500 | 1.1 |
| 800 | 10.2 |
| 1100 | 8.0 |
| Cs-Si-20% | 500 | 1.1 |
| 800 | 8.6 |
| 1100 | 7.0 |

*a* Adopting the line-broadening technique and Sherrer formula

**
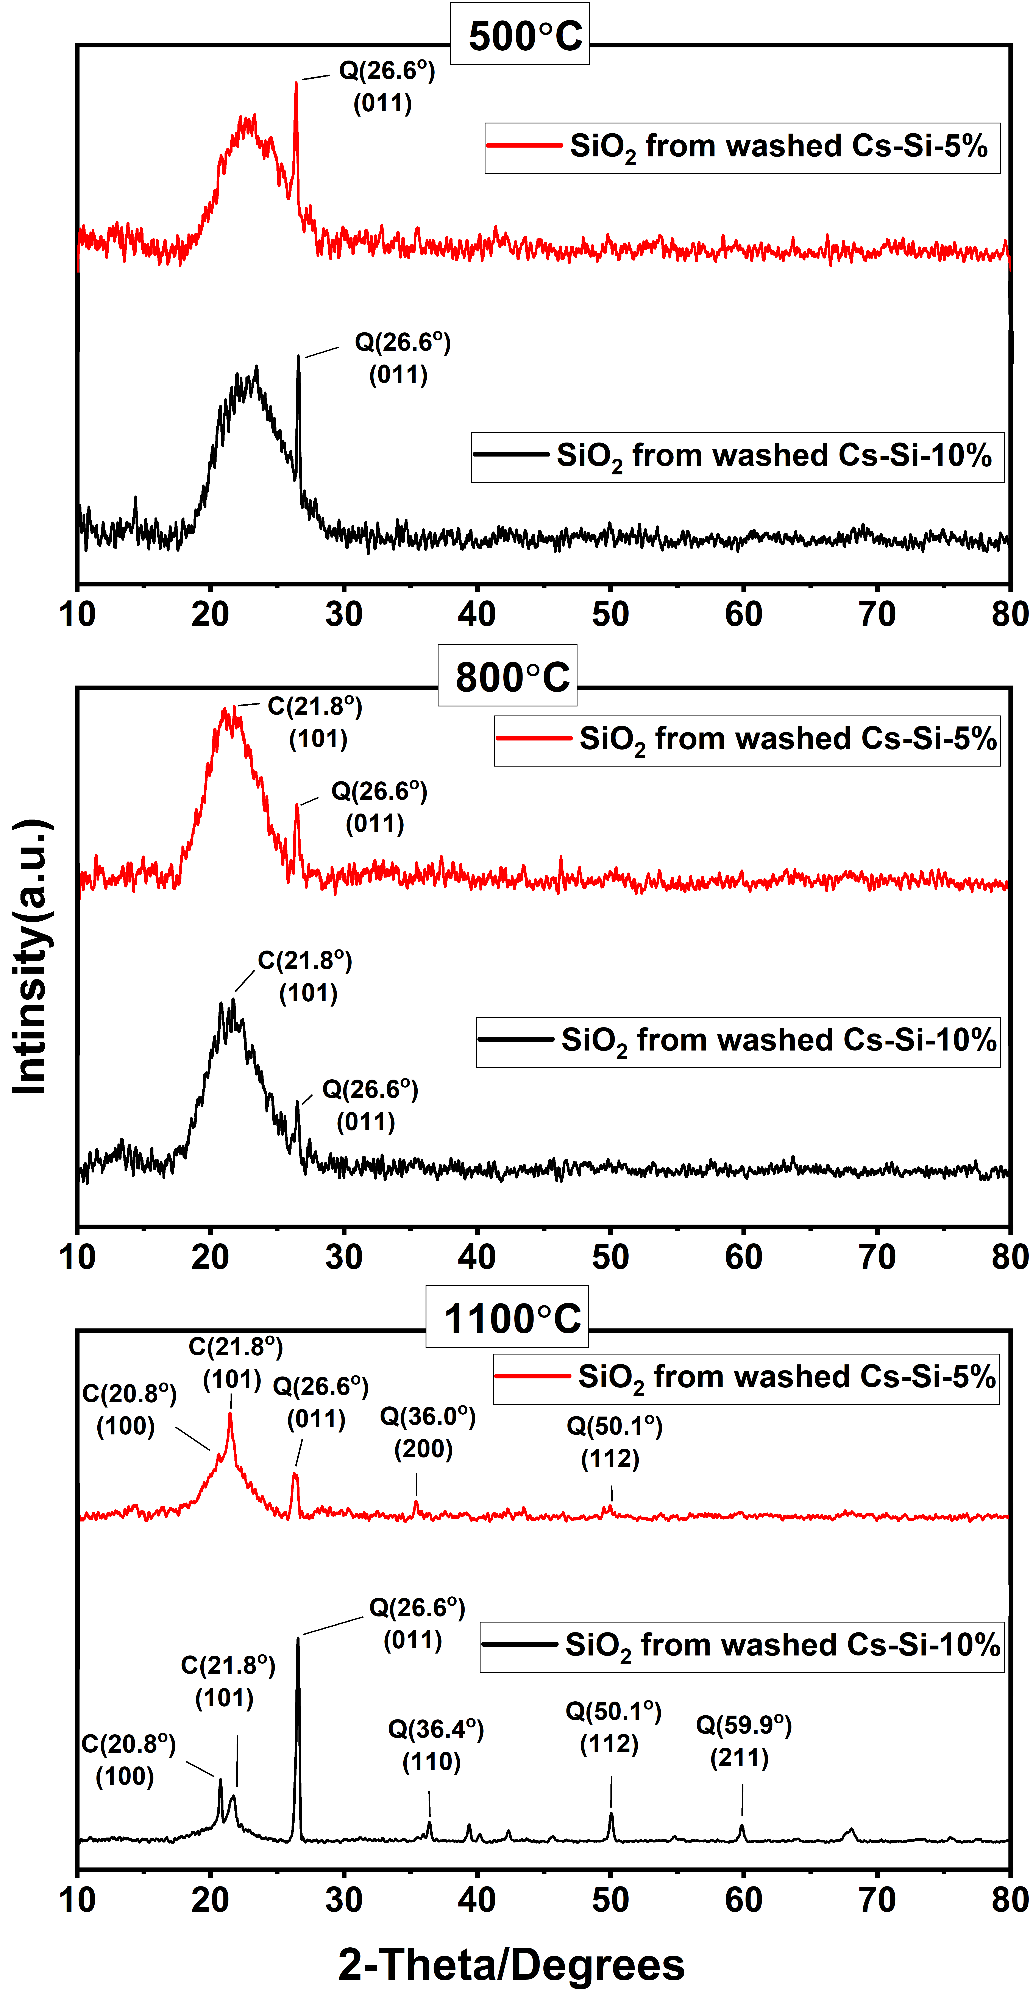
**

Figure 6S. XRD of SiO2 NPs recovered (at 5 and 10 loading%) from the 3%-washed Cs at the indicated temperature.

*3.2.4 N2 sorpotiometry*

*Ι. Sorption isotherms*

**
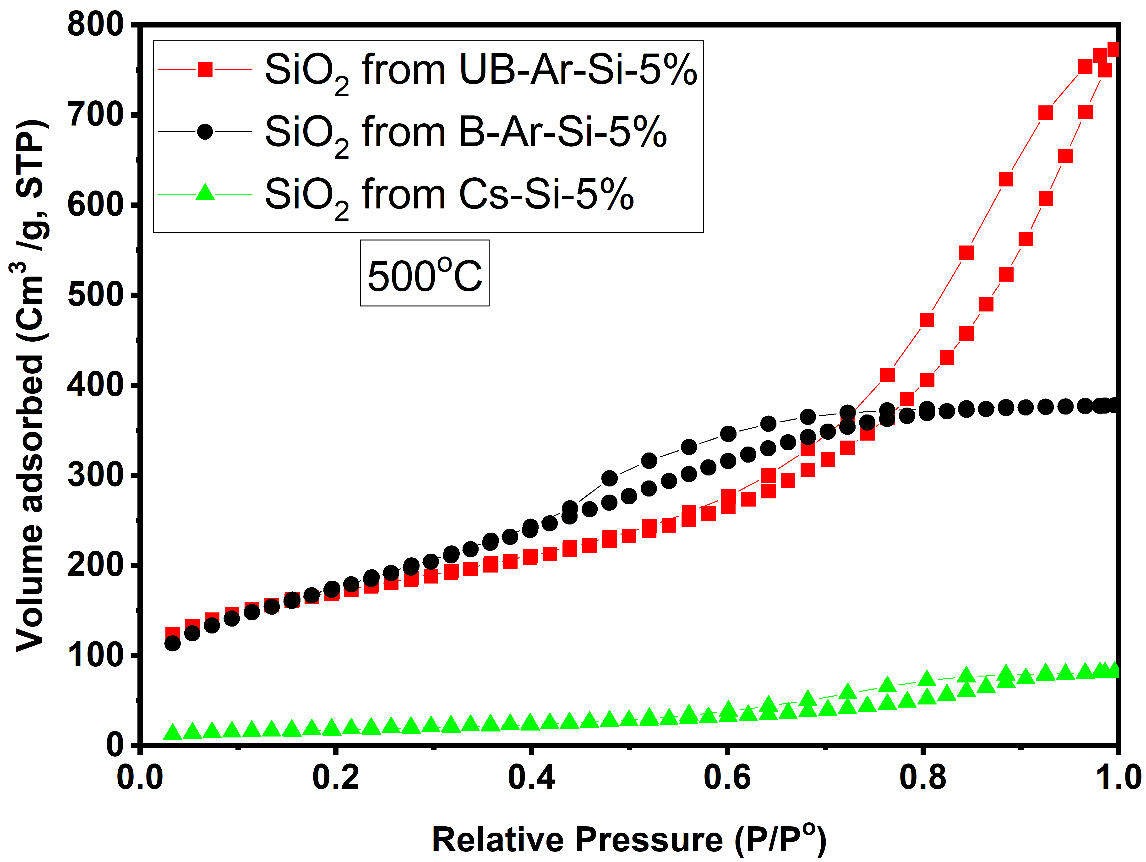
**


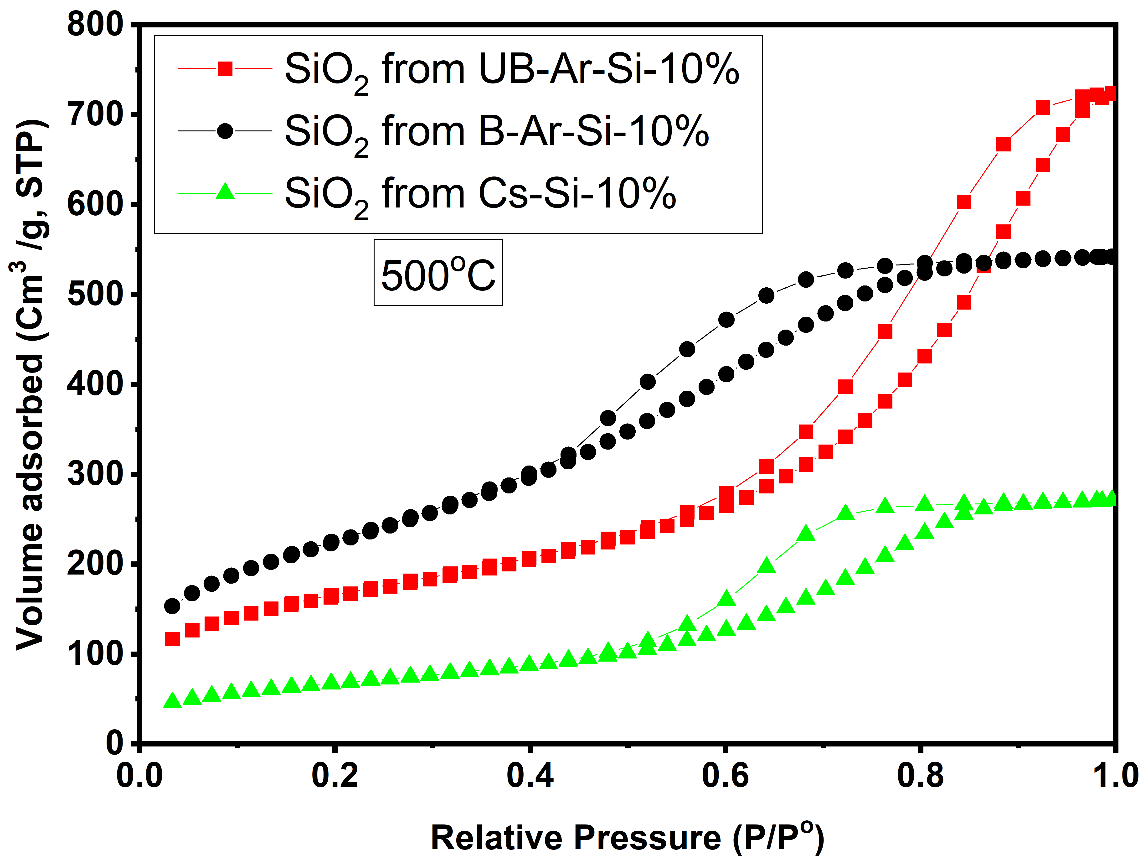


Figure 7S. Comparison of N2 sorption isotherm of SiO2 NPs recovered at 500°C from the three-studied hybrid films at 5 and 10 loading%.

*ΙΙ. Specific surface area and porosity*


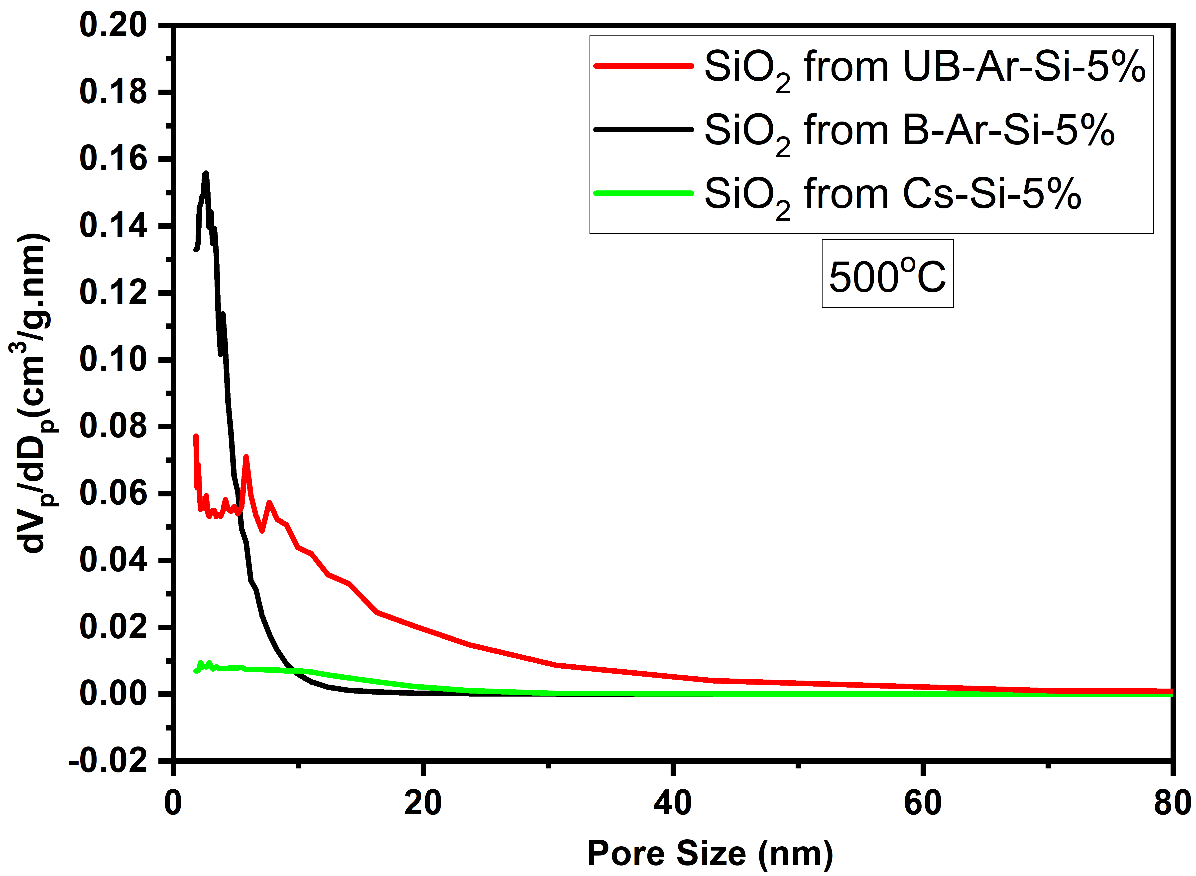


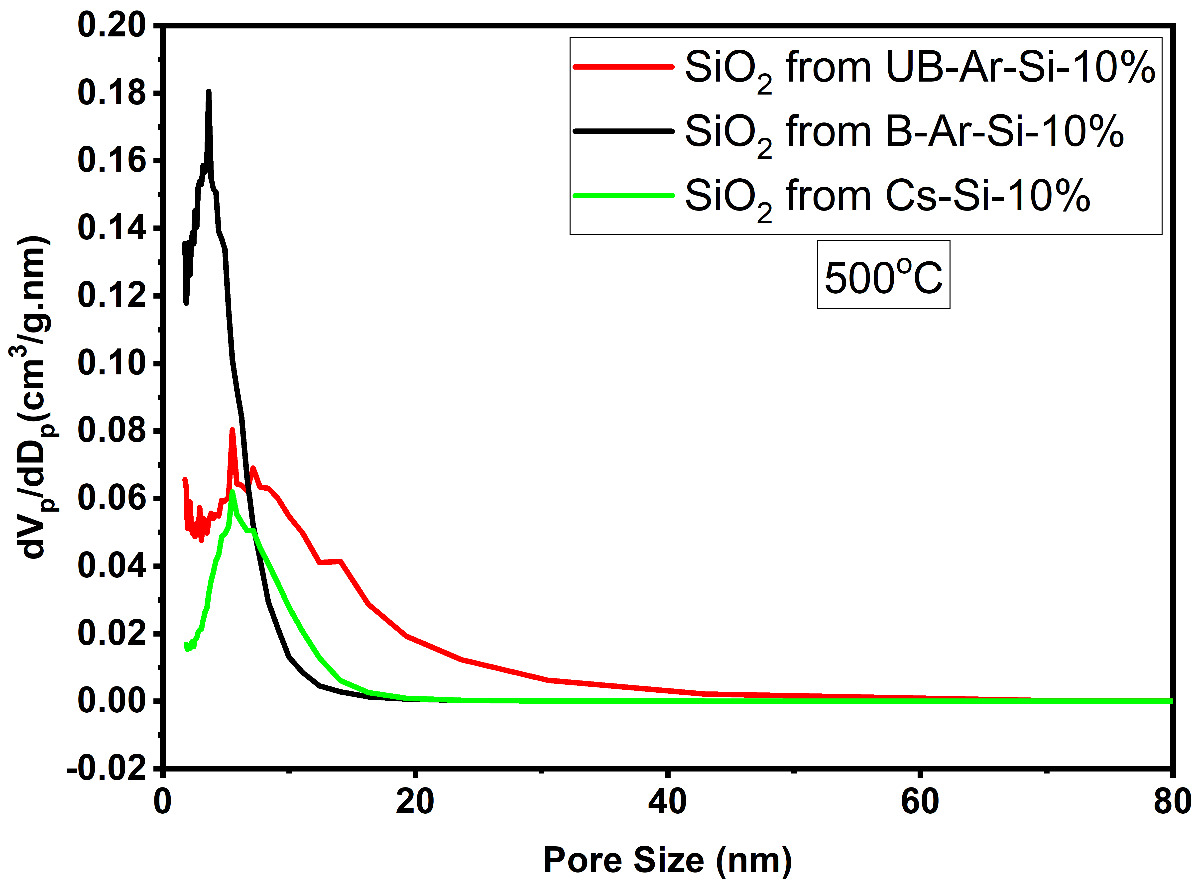


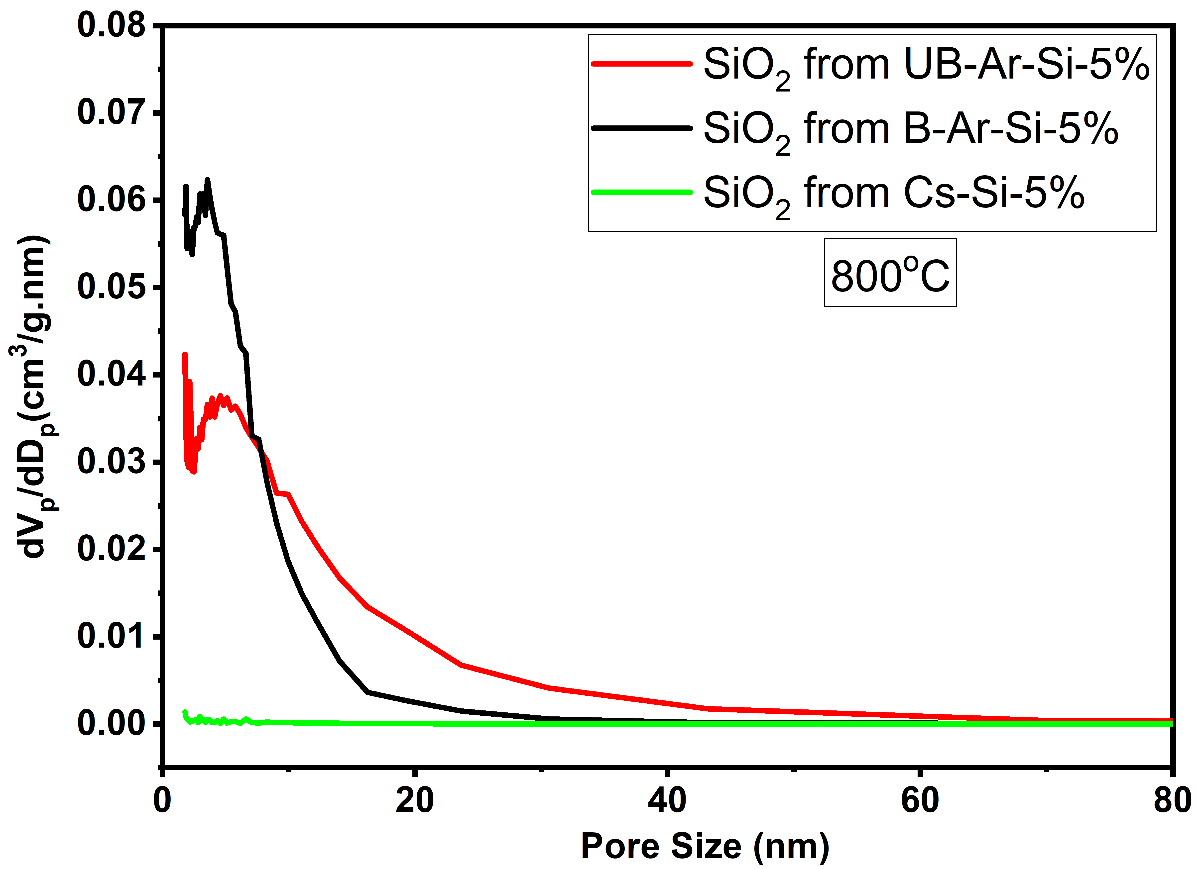


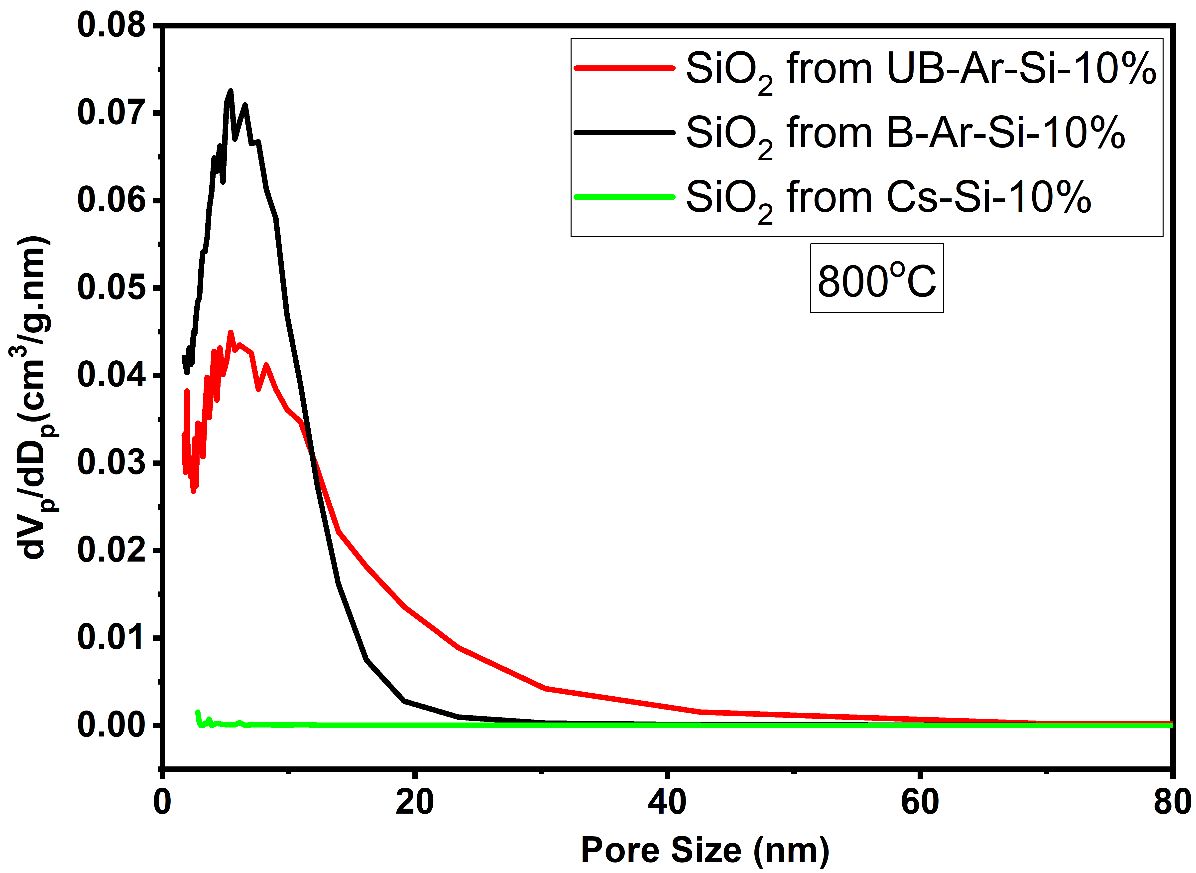


Figure 8S. Comparison of pore size distribution of SiO2 NPs recovered at the indicated temperature from the three studied hybrid films at 5 and 10 loading%.

*3.2.4 Microscopy analysis*


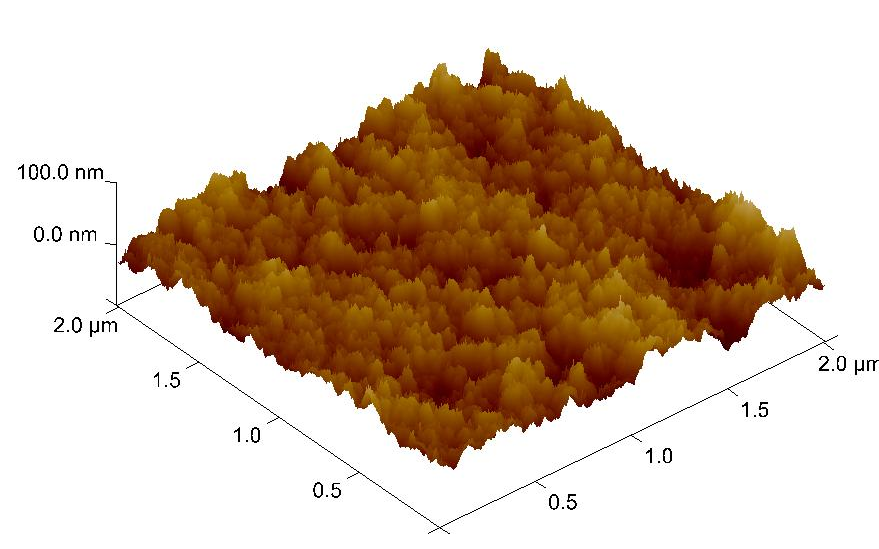

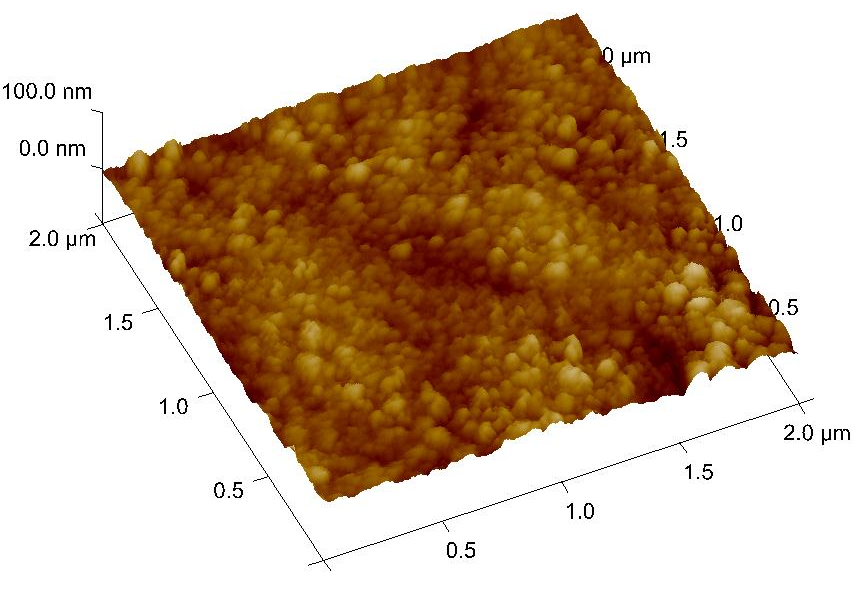


(a)

(b)


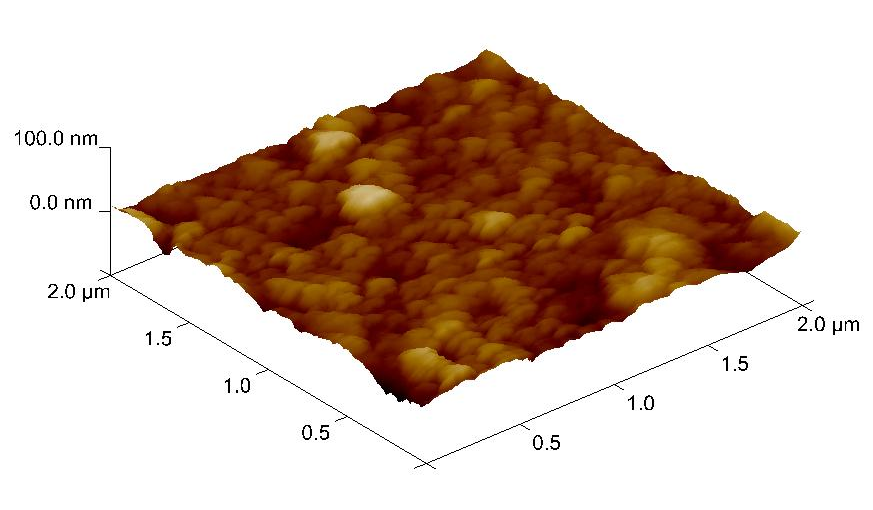

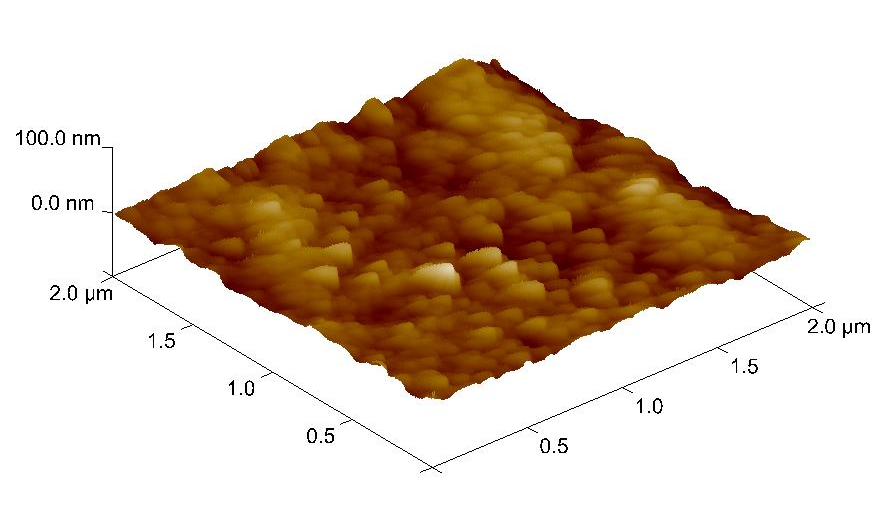


(c)

(d)


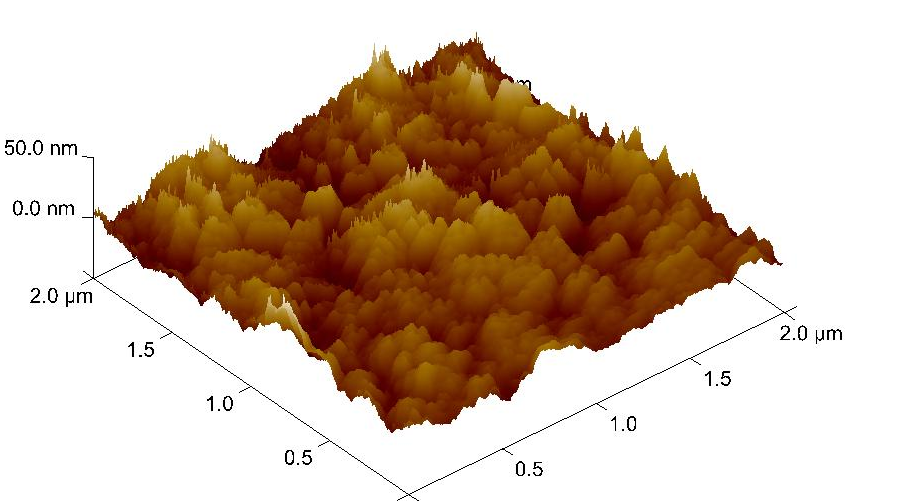

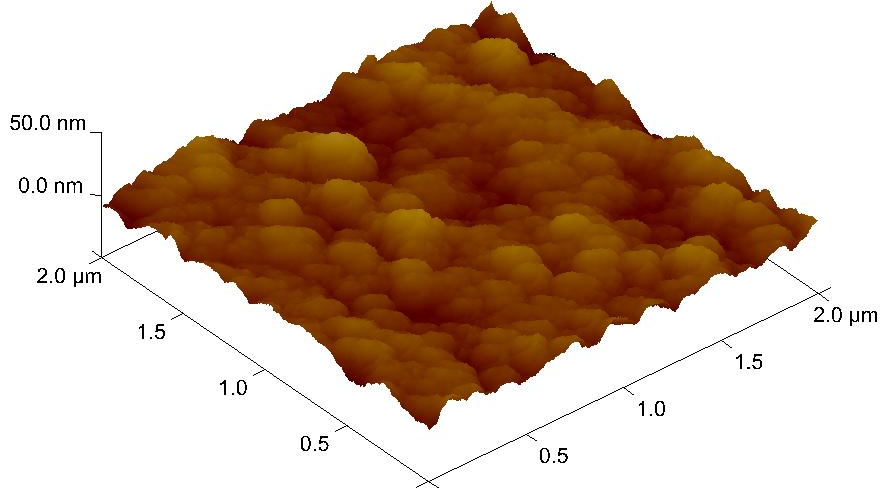


(e)

(f)


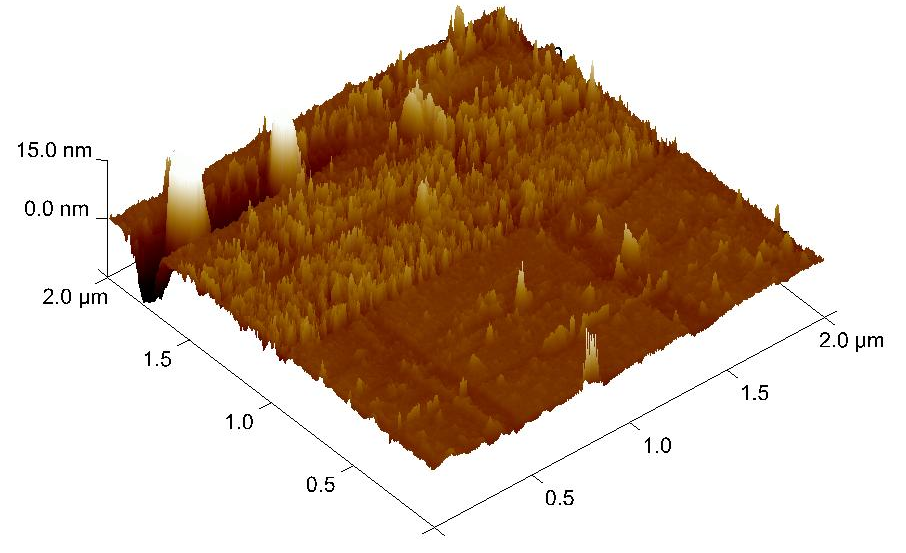


(g)

Figure 9S AFM micrograph of SiO2 NPs recovered at 500°C from UB-Ar-Si-5% (a), UB-Ar-Si-10% (b), B-Ar-Si-5%(c), B-Ar-Si-10% (d), Cs-Si-5% (e), and Cs-Si-10% (f) hybrid films. (g) Cs-Si-5% recovered at 800°C.
